# Supplementary material for: Identification and validation of a ferroptosis-related lncRNA signature to robustly predict the prognosis, immune microenvironment, and immunotherapy efficiency in patients with clear cell renal cell carcinoma
Source: PeerJ journal article supplement (doi:10.7717/peerj.14506), 2022-12-19
Supplement: code1.zip [file code1.zip]

gene	conMean	treatMean	logFC	pValue	fdr
RPL8	360.977616666667	592.447229814471	0.714777274750299	6.00555621974487e-20	1.99857034853805e-19
IREB2	6.81107636111111	6.09286833487941	-0.160761242303468	0.00415239754688097	0.00507793193986046
ATP5MC3	43.5836591666667	22.9065219703154	-0.928028903788993	1.6500152379346e-30	1.11651031100241e-29
CS	30.8866486111111	23.7538745176252	-0.378820486255591	1.46425171456512e-18	4.57297073933414e-18
EMC2	9.48054438888889	10.4257887606679	0.137114725959415	0.000463340698878468	0.00063985144130836
ACSF2	25.5642681111111	2.72177838849722	-3.23150721294248	4.86304849599665e-30	3.18451240221716e-29
NOX1	0.309495540277778	0.300848387235622	-0.0408819979572455	0.00487517589264797	0.00592611201321879
CYBB	5.94848556944444	21.4053079469388	1.84737426779262	1.70619297411252e-20	5.87046057194647e-20
NOX4	13.9417760263889	5.86759481539889	-1.24857320134304	0.00341725373602821	0.00420425762674986
DUOX1	0.290140633333333	0.427628909474954	0.559607033642503	0.409834095162708	0.424471027132805
G6PD	8.68677547222222	10.1802039745826	0.228873814443391	0.0730832392477459	0.0824216531516245
PGD	35.9220042083333	20.1861422244898	-0.831502621660111	2.49879302682272e-31	1.95098070940389e-30
VDAC2	29.9144170833333	24.2709471669759	-0.301610540340984	1.26244385453734e-09	2.44072478543886e-09
PIK3CA	4.17668856944444	3.78270389591837	-0.142941725495813	0.00151766527661429	0.00201363432125948
SCP2	28.8370347222222	19.3586522179963	-0.574944308352766	1.27848278253237e-30	8.94937947772659e-30
TP53	9.53489720833333	13.3783824842301	0.488614406563055	4.22139793248788e-16	1.12755760565137e-15
ACSL4	37.34497875	13.0919168181818	-1.51223793619406	2.99188639196974e-38	1.51838234392464e-36
LPCAT3	6.31170536111111	7.41593208497217	0.232598171858148	0.0762090539150608	0.0854720328439632
NRAS	15.0918630555556	20.0116327402597	0.407067966674569	1.19707756822695e-09	2.33660333028914e-09
KRAS	7.322336375	6.45409686122449	-0.18208882044893	5.49525713847931e-05	8.08360289211087e-05
HRAS	9.93185466666667	15.5036934335807	0.642476892880194	5.48294352288585e-17	1.5900536216369e-16
TF	0.247983322847222	4.3573766267384	4.13514481080885	1.8759819567564e-06	2.9070560093248e-06
SLC38A1	21.18177475	31.9588342486085	0.593391311552884	7.16605525997941e-10	1.45470921777582e-09
SLC1A5	17.404626375	20.7237914916512	0.251817129312431	0.0801766811968388	0.089427836719551
GOT1	84.9506943055556	40.8426931187384	-1.05654773971226	4.68145562496238e-28	2.56847430234423e-27
CARS1	2.76314434722222	4.66803250834879	0.756503677259998	1.97743347599964e-36	4.01418995627927e-35
ALOX5	2.98066723472222	12.6033022046382	2.08009456009804	3.04714262518639e-25	1.40584080207463e-24
KEAP1	15.4085638888889	18.6566322560297	0.275956180226625	1.75839049078221e-14	4.46191587035986e-14
HMOX1	24.8709688263889	128.401411051206	2.36812644420405	1.97003462617384e-32	1.90436680530138e-31
ATG5	10.0771401388889	7.21931088682746	-0.481153226976711	4.59314737689252e-26	2.27416809148581e-25
ATG7	2.67676533333333	2.80045335825603	0.0651697339681612	0.763934798965452	0.779290272311491
NCOA4	88.7346268055555	70.6024744972171	-0.329778447131167	5.49353640219163e-10	1.12645241378273e-09
PHKG2	2.61004497222222	3.05911173543599	0.22903813766654	0.136167517538679	0.146254000319322
ACO1	25.1152234722222	12.0905394489796	-1.05468349660312	1.86039897315391e-24	8.03534024574987e-24
ULK1	5.83062956944444	8.56271522059369	0.554416676388786	1.16564372876023e-09	2.30755072899467e-09
ATG3	7.35798533333333	7.04152404638219	-0.063423085336646	0.0302418669629551	0.0354861213495947
ATG4D	8.26618347222222	6.77201830853432	-0.287635511784827	7.97087886081775e-12	1.77811913049011e-11
BECN1	9.32094425	6.87016654211503	-0.440131040882559	9.44254847379632e-20	3.09167312932363e-19
MAP1LC3A	11.7493300833333	9.26928921948052	-0.342047879793017	5.91346029334456e-12	1.33381382172105e-11
GABARAPL2	37.6068468055556	27.1887935714286	-0.467983209703045	2.47880019097189e-23	9.49427242957158e-23
GABARAPL1	84.3601098611111	28.6990207588126	-1.55555946248869	2.9989926815619e-37	8.69707877652951e-36
ATG16L1	4.00274444444444	7.82240609461967	0.966622924817087	2.84911333840632e-22	1.0710555698083e-21
WIPI1	7.48557734722222	7.58614595361781	0.019253535939864	0.960032984306816	0.960032984306816
WIPI2	9.4101945	8.76554055473098	-0.102381480359105	1.29947109813133e-08	2.35529136536304e-08
SNX4	24.6822925	16.9867261168831	-0.53906857270078	2.02294858960726e-19	6.51838989984562e-19
ATG13	13.6967609722222	12.468976812616	-0.13549167870798	2.47697329125952e-05	3.72463391204209e-05
ULK2	2.95778079166667	2.85193649888683	-0.0525732756133681	0.0921300390257113	0.101643466968584
SAT1	120.696885	129.380633487941	0.100233238922052	0.923270460302116	0.927841106145196
EGFR	10.2383024583333	28.3987468059369	1.47185073522508	8.44143266104139e-24	3.29540544267577e-23
MAPK3	19.0100766666667	23.9075660018553	0.330702908309938	1.7263497806757e-11	3.72818090933156e-11
MAPK1	18.4707026388889	20.7386125157699	0.167080627611584	0.00917460134098419	0.0109555533659988
BID	2.75022775	5.89201881076067	1.099210941235	1.09640249708466e-35	1.58978362077276e-34
ZEB1	4.46421947222222	7.27601560482375	0.704740681715424	4.97088580888887e-11	1.04029878268499e-10
DPP4	27.2065816527778	42.7870371982189	0.653218080736385	0.00082788159982564	0.00111297989910334
PEBP1	663.808847222222	285.842859257885	-1.21554560749186	9.0039473081464e-33	9.1390065177686e-32
SOCS1	6.17818526388889	5.75992916530612	-0.101132063652291	0.0428205003374624	0.0491105173361857
CDO1	1.75436021805556	0.563762829638219	-1.63778473739377	9.37960893222146e-34	1.00213716486366e-32
MAPK8	3.93437030555556	3.25830373766234	-0.272011653887177	3.4365173456743e-11	7.34329495970403e-11
MAPK9	5.48885948611111	6.18344218423006	0.171903770842441	0.000125834721718559	0.00018116630148133
MAPK14	10.288756	9.29775043970315	-0.146114950202021	0.00190163993050835	0.00244324623983035
LINC00472	4.81863960277778	1.32925351053803	-1.85800962604639	2.13741837519571e-35	2.89263953443153e-34
PRKAA2	11.2897099722222	7.14755524922263	-0.659486652607526	1.76999666296114e-18	5.44408064516836e-18
PRKAA1	16.7681131944444	14.6363024044527	-0.19616923205004	8.01550194967128e-05	0.000116224778270234
BAP1	15.6719014444444	11.861248890538	-0.401924308469288	2.20929010239644e-21	7.86817352256978e-21
ABCC1	6.61044173611111	10.7661621178108	0.703685468151706	8.61028433061455e-17	2.46181368889402e-16
ACVR1B	26.2190509722222	13.4241763191095	-0.965781896535562	9.00812717396401e-37	2.03183312923855e-35
TGFBR1	15.7521150972222	14.2008363413729	-0.149569659803055	0.308903138351324	0.324908482307351
EPAS1	78.1694691666667	122.722950875696	0.650727932138096	5.85508539743078e-07	9.50865868542759e-07
HILPDA	4.37216029166667	112.6098692	4.68684316752898	6.5843481550009e-39	6.68311337732591e-37
HIF1A	77.6149331944444	33.7289689499072	-1.20234603741023	6.60231946270513e-24	2.62798206064538e-23
ANO6	21.0143563888889	27.3210434693878	0.378637313919441	6.41894426418945e-07	1.02602022490587e-06
LPIN1	3.39392134722222	1.87623502263451	-0.855112576050879	7.2115125606518e-28	3.85246592055872e-27
HMGB1	23.0422481944444	24.1093457569573	0.0653110167491509	0.0200116297151988	0.0237564960946512
TNFAIP3	6.15699815277778	15.3819318975881	1.32093766949582	3.50988243694728e-25	1.58334696600066e-24
TLR4	5.908661125	8.09490760742115	0.454183354700698	0.000180459194313278	0.000256176338780388
ATF3	46.7766749722222	20.4637496693878	-1.19271879307697	1.17082623195296e-09	2.30755072899467e-09
ATM	2.47568491666667	4.20721219335807	0.765036870421882	1.59298694743164e-16	4.42981301820031e-16
YY1AP1	7.98099783333333	8.89049183302412	0.155694100626991	7.05269664913129e-05	0.000102999814372205
EGLN2	1.798449875	2.74590666827458	0.610528639620308	1.03554542795261e-15	2.73007431005688e-15
TAZ	2.51215655555556	5.38509528033395	1.10004549647848	2.19420114424063e-28	1.23728564522458e-27
MTDH	18.7463270833333	21.7392701372913	0.213695544904818	0.000245000068701269	0.000343000096181777
IDH1	20.6176115833333	13.4476778608534	-0.616520145177617	1.97834210054826e-07	3.29183152796145e-07
SIRT1	6.65288041666667	7.06349624508349	0.086403354444776	0.143022836586884	0.152808609616513
FBXW7	1.40040972222222	2.08465521855288	0.573959813146621	3.53409268255203e-18	1.03974031095371e-17
PANX1	5.90641744444444	7.66204917884972	0.375446961130187	2.71341834220229e-05	4.05017590784606e-05
DNAJB6	5.54281925	4.9767298961039	-0.15542187323442	1.7296186908742e-05	2.62024324065271e-05
BACH1	6.85005544444444	8.36951587755102	0.289028509282641	0.00049128639758343	0.000673859045334029
LONP1	17.5354421388889	20.1721119719852	0.202088331403783	0.00153258819582634	0.00202022989449836
PTGS2	5.72714440138889	2.50584540040816	-1.19251856982713	2.04171370535287e-14	5.11688743440287e-14
DUSP1	263.008840555556	508.049262003711	0.949857098027641	5.03930176821864e-12	1.16247529425953e-11
NOS2	0.594138609722222	1.20480005571429	1.01992229251596	0.00242395606950478	0.00305629243546255
NCF2	2.06247317916667	6.99441495844156	1.76182803113347	8.43524713985892e-28	4.39065428049067e-27
UBC	141.898362916667	251.142670779221	0.823649227638868	3.56132400994431e-29	2.0655679257677e-28
SRXN1	0.590810676388889	0.631870410241187	0.0969328107425008	0.78134109308132	0.79306120947754
BNIP3	18.2741768055556	54.2752014619666	1.57048675718557	5.10688085811134e-30	3.23967754436438e-29
OXSR1	12.5349102083333	9.06615360408163	-0.467389152184315	1.34728663150855e-24	5.94563448252686e-24
SELENOS	11.3287666388889	12.7761800853432	0.173465749649185	0.000409633964297502	0.000569559553098582
SLC7A11	0.114650648055556	0.388249871831169	1.75974093866651	1.52133056971428e-25	7.35309775361902e-25
DDIT4	32.3259886111111	145.028295170686	2.16556800188529	2.2420662041909e-31	1.82055775780301e-30
ASNS	3.07427741666667	5.47239821762523	0.831925859815785	4.03587661196038e-14	9.99125551497509e-14
TSC22D3	35.1736077777778	78.1243894137291	1.1512796885913	2.70732993869788e-13	6.62154189826108e-13
DDIT3	16.9703739861111	21.2567084415584	0.324899856995589	0.52304160783085	0.538971809084582
JDP2	3.17889268055556	3.80973097346939	0.261164812603741	0.0365414015551966	0.0421471847483233
SESN2	11.20349125	7.65388268033395	-0.549684684820472	1.40040026747744e-08	2.51576331237098e-08
SLC1A4	1.44033852222222	5.58899987884972	1.95618221613383	2.02814841395333e-38	1.37238042677509e-36
PCK2	50.9118255555556	10.9564350181818	-2.2162223439664	1.11009194000951e-09	2.23117488932605e-09
TXNIP	386.734194444444	293.89941257885	-0.396019855487692	1.48412635870185e-08	2.64278641067084e-08
VLDLR	5.23940334722222	8.00170583079777	0.610905061521761	3.9937797586764e-09	7.43795679826889e-09
GPT2	7.45080825	3.42057138571429	-1.12315959627072	2.92844141674795e-18	8.74225893529167e-18
PSAT1	44.9585667222222	7.96922128120594	-2.49608538109412	4.15077983098504e-24	1.71960878712237e-23
LURAP1L	3.88837655555556	8.00442909220779	1.04163056943432	1.49206051636241e-16	4.20678173363291e-16
HERPUD1	42.8915383333333	48.5616162152134	0.179123377686398	0.034307365706232	0.0397965442192291
SLC3A2	44.0167655555556	30.7207159146568	-0.518841299887055	1.7418970748512e-06	2.72003927842149e-06
ATF4	53.0458072222222	102.903152690167	0.955976554273847	7.67202796454375e-30	4.58065199059524e-29
ZNF419	0.774382170833333	1.06680220686456	0.46217507258314	7.37764797661823e-09	1.36151139932136e-08
KLHL24	9.52876720833333	9.1791726567718	-0.05392545085506	0.00706055449103336	0.00853150334333198
TRIB3	2.15118473472222	18.0405748194805	3.06804197953699	9.85074466263943e-36	1.53823166655062e-34
ZFP69B	0.410985902777778	0.617238583020408	0.586739337386056	4.67444211290459e-12	1.09070315967774e-11
ATP6V1G2	0.972420825	0.46473130864564	-1.0651839483657	1.96213920150429e-25	9.26312227686909e-25
VEGFA	10.7903161944444	125.71551777551	3.5423536941096	2.71264832911637e-37	8.69707877652951e-36
GDF15	79.5571822916667	34.448153364564	-1.20756553300462	1.93790466981131e-16	5.3161438915094e-16
TUBE1	1.69667473055556	2.19028062467532	0.368405711277505	0.00244689099221237	0.00306616587295748
ARRDC3	45.2673997222222	61.3555115899814	0.438720510786894	0.000967051085818852	0.00129152217382386
CEBPG	7.48371809722222	9.30464053803339	0.314195201383979	4.62718560708412e-08	7.96032778167861e-08
RGS4	1.03650186805556	1.50436444588126	0.537431398693761	0.0477074971600236	0.0544079883341842
EIF2S1	10.2146548194444	11.0553415306122	0.114103142388619	0.0259729346320304	0.0306541030831522
CXCL2	2.54818018819444	7.80935408458256	1.61573592952776	8.0381859486399e-08	1.37121995594445e-07
RELA	13.8124868194444	17.30383532282	0.325118752820337	1.39026866026369e-15	3.57246250675353e-15
HSD17B11	23.2090722222222	30.3944161706865	0.389117454725428	6.49002449939817e-07	1.02927732295143e-06
AGPAT3	16.802092	13.045347380334	-0.365105509975829	4.37114375778257e-06	6.72228926386259e-06
SETD1B	4.27452068055556	4.88612585139147	0.192928369630065	0.00187439983936944	0.00242358705345221
FTL	3333.12949583333	3626.08209814471	0.121534220654684	0.10395376306398	0.113454913451548
MAFG	4.82161776388889	5.84675169758813	0.278118038495839	0.000168102740619515	0.000240315889758884
IL33	4.41194539444444	5.46910991764378	0.309891122374856	0.00235076967878954	0.00300129713707092
FTH1	169.418175416667	299.454625009276	0.821748757292109	4.89984301231003e-22	1.80848751181625e-21
SLC40A1	44.0385115277778	52.3864825269017	0.250428888376773	0.325407000171631	0.340503201210521
GPX4	92.5087956944444	130.925210532468	0.501080476639971	1.16603052771229e-07	1.95623303409583e-07
HSPB1	180.698103194444	304.836728002226	0.754455373055918	1.5882214036964e-09	3.0415938202865e-09
NFE2L2	32.4052497222222	23.154474987013	-0.484936506614829	9.33098630930516e-19	2.95967221998273e-18
STEAP3	3.94732864861111	9.91463127458256	1.32868247874442	0.0875556958542924	0.0971246243629582
MAP3K5	6.12812683333333	7.12235226474954	0.216907634874635	0.002406884181866	0.00305373430574249
SLC2A1	16.1421025138889	63.5368224003711	1.97676443754677	6.95887071332239e-30	4.28075986304377e-29
SLC2A3	5.57060998611111	22.7955220981447	2.03284323485118	1.51243821408221e-26	7.67562393646722e-26
SLC2A6	1.13662377361111	1.80906687280148	0.670490942469007	2.69279134233517e-08	4.67210805550461e-08
SLC2A8	3.85835388888889	4.80385799387755	0.316208030687583	0.00181660505488998	0.00236391555219658
EIF2AK4	5.168820125	5.16969475881262	0.000244102732597007	0.807104072204825	0.81513495849542
SP1	16.3786520833333	19.5121695213358	0.25255756525722	6.05234181506999e-07	9.75099514650165e-07
NNMT	18.3163294638889	268.462651672171	3.8735190696296	9.25398953169078e-36	1.53823166655062e-34
PLIN4	0.885397074444444	0.689066677833024	-0.36168101375783	0.0027444203295012	0.00340498167688538
HIC1	0.9109305625	1.68867506324675	0.890478758820857	1.31227488356963e-11	2.89556305831125e-11
STMN1	12.5914610833333	9.85744886456401	-0.353159473191016	8.73041414821462e-08	1.47689506007297e-07
RRM2	0.665280766527778	2.89982107970315	2.12392865736059	2.81252676758682e-32	2.48236058182663e-31
CAPG	60.5887779166667	56.99700716141	-0.0881644392872714	0.0637175463207793	0.0722606810230067
HNF4A	16.3479292001389	10.8884309524026	-0.586311827034272	0.0930952402963784	0.102153155568458
YWHAE	145.972075	134.133453562152	-0.122023305018283	0.000199198659751844	0.000280814777289058
GABPB1	2.33479838888889	2.54877082374768	0.12650367946106	0.00915558249618755	0.0109555533659988
AURKA	1.14949683888889	2.19902038961039	0.935858482459057	3.91170046873182e-21	1.36909516405614e-20
RIPK1	10.6439734722222	12.9152712393321	0.279041122576525	5.88401868989308e-12	1.33381382172105e-11
PRDX1	198.565405555556	137.029066363636	-0.535132348099924	6.60231946270513e-24	2.62798206064538e-23
AKR1C1	8.40291954722222	3.82134494521336	-1.13681017849594	1.97311044415464e-08	3.45294327727062e-08
AKR1C2	3.01228166111111	1.2516708035807	-1.26700149912505	0.000733586820154602	0.000992787496609228
AKR1C3	16.7488464722222	26.9325874489796	0.685291100507883	2.08416031082152e-10	4.31718921527315e-10
RB1	13.4382051944444	16.9844839825603	0.337876922605101	1.8172162688699e-08	3.20778176157034e-08
HSF1	10.6932421111111	13.8248873987013	0.370568396268967	1.63810219287069e-12	3.86668308317151e-12
GCLC	4.191843	4.62964837922078	0.143317941643937	0.16867123459834	0.179268380227555
SQSTM1	28.4756233333333	41.9110285825603	0.557602505625183	3.53949297849716e-16	9.58022766179898e-16
NQO1	18.3018183611111	13.6352076474954	-0.424650322433652	1.21643360545505e-12	2.90512966949853e-12
MUC1	62.0803163888889	20.4833416100742	-1.59968481732973	2.04541379824225e-31	1.73007917101324e-30
CISD1	18.1587130555556	16.4042213283859	-0.146594845576359	2.77531694466226e-07	4.58040113631251e-07
FANCD2	0.580270919444444	0.707862156957328	0.286741820174951	0.00158202602794327	0.00207194376562893
HSPA5	150.01937125	156.093646549165	0.0572630160274139	0.346464324757627	0.360678245773325
HELLS	0.681100995833333	0.830404914285714	0.285946239969254	0.0334115585776351	0.0389801516739076
SCD	11.1617054861111	90.0177986643785	3.01165279993729	3.02108499836924e-35	3.83300159168097e-34
FADS2	2.72343412083333	5.0471765768089	0.890049591406547	6.51243799270542e-06	9.94003693623459e-06
SRC	8.05802323611111	8.80806883302412	0.128399777627867	0.197131576330266	0.208425572890854
STAT3	35.1246097222222	27.7480666549165	-0.340094940036204	8.40846342134746e-09	1.53776403111129e-08
PML	4.12749198611111	9.57467158998145	1.21395758960782	3.33295687117713e-36	6.15082040771779e-35
MTOR	9.44833815277778	4.22955075751391	-1.15955616384689	8.30263748812921e-37	2.03183312923855e-35
NFS1	7.93737776388889	5.44873008348794	-0.542742444183009	1.94394648935594e-24	8.22127369456783e-24
CDKN1A	46.1033260972222	71.9809150148423	0.642743604996681	1.48347286047212e-11	3.23811817931011e-11
ENPP2	23.147985	70.0544909150278	1.59759092471856	4.69389564483835e-11	9.9256334989811e-11
FH	49.954865	26.3982529684601	-0.920182730467758	2.62829639627268e-32	2.42520076565161e-31
CISD2	13.9383230555556	19.6276398738404	0.493829707883723	3.99868545306473e-13	9.66348984490643e-13
ISCU	38.9740155555556	24.7241164508349	-0.656593617076542	6.02912592859634e-31	4.37111629823235e-30
ACSL3	15.3741594861111	8.00749446011132	-0.941084739662132	6.23823754592368e-34	7.03534567679171e-33
OTUB1	14.7993625	13.2312748051948	-0.161582962488787	9.3788761913536e-07	1.4759006719727e-06
CD44	7.40546297222222	19.1090518048237	1.36759435589408	2.19317958654205e-18	6.64500680698561e-18
BRD4	6.75225015277778	7.39591989332096	0.131361245688643	0.00275082263551331	0.00340498167688538
PRDX6	120.263420555556	92.4752383116883	-0.379058879304001	1.09878443770844e-21	3.9830935866931e-21
NF2	8.721842875	7.38790676623377	-0.239467340397342	4.05607480173186e-07	6.64018697380296e-07
ARNTL	1.81368490138889	2.3882848377551	0.397051076709054	2.78232952295724e-05	4.12272184788555e-05
JUN	96.6073893055556	105.044871007421	0.120800274471897	0.134493973325802	0.145224875452861
CA9	2.24313617513889	136.051995089295	5.92249709698021	5.35169781790539e-38	2.17278931406959e-36
TMBIM4	17.520922375	14.0562696419295	-0.317864954473795	2.32498669023004e-09	4.4109560571654e-09
PLIN2	26.3727801388889	208.070086975881	2.97994800323136	2.62692668536015e-31	1.97505969306708e-30
AIFM2	3.68357215277778	4.33814572077922	0.235973012763073	0.000733586820154602	0.000992787496609228
LAMP2	48.0668940277778	49.832340877551	0.0520387634596915	0.711399444602487	0.729364077041944
ZFP36	161.6303975	197.03576770872	0.285758996136192	0.110619283340873	0.12008403485667
PROM2	28.9420993180556	2.42089845517625	-3.57955509996027	1.98693433997469e-39	4.03347671014862e-37
CHMP5	42.9379372222222	34.4522325528757	-0.317655409856019	2.42851424278387e-09	4.56470732671413e-09
CHMP6	9.22196431944444	12.1992824768089	0.403650306561732	1.08461048970769e-15	2.82276832577771e-15
CAV1	14.6949154027778	67.8271297289425	2.20654538937367	5.36885420047591e-35	6.41104354527417e-34
GCH1	8.12342995833333	3.89354355992579	-1.06100523877383	4.83273077987408e-20	1.6350739138574e-19
