# Supplementary material for: Identification and validation of a ferroptosis-related lncRNA signature to robustly predict the prognosis, immune microenvironment, and immunotherapy efficiency in patients with clear cell renal cell carcinoma
Source: PeerJ journal article supplement (doi:10.7717/peerj.14506), 2022-12-19

|                | pvalue | Hazard ratio        |
|----------------|--------|---------------------|
| SLC16A1-AS1    | <0.001 | 3.781(2.310–6.189)  |
| PCED1B-AS1     | <0.001 | 1.184(1.096–1.278)  |
| MMP25-AS1      | <0.001 | 1.315(1.151–1.504)  |
| LINC00894      | <0.001 | 2.991(2.069–4.324)  |
| DUXAP8         | <0.001 | 4.211(2.554–6.943)  |
| LINC01426      | <0.001 | 1.084(1.047–1.123)  |
| AL022322.1     | <0.001 | 1.272(1.129–1.434)  |
| ASMTL-AS1      | <0.001 | 1.098(1.054–1.144)  |
| AC005785.1     | <0.001 | 1.589(1.299–1.945)  |
| AC079322.1     | <0.001 | 5.491(2.823–10.679) |
| PVT1           | <0.001 | 1.287(1.184–1.399)  |
| AL031714.1     | <0.001 | 2.116(1.472–3.042)  |
| USP30-AS1      | <0.001 | 1.169(1.066–1.282)  |
| MIR155HG       | <0.001 | 1.105(1.061–1.152)  |
| AC107021.2     | 0.001  | 1.128(1.048–1.213)  |
| LINC01355      | <0.001 | 1.874(1.561–2.250)  |
| TRG-AS1        | <0.001 | 1.681(1.277–2.211)  |
| FAM13A-AS1     | <0.001 | 1.397(1.158–1.685)  |
| AL021707.6     | 0.001  | 1.115(1.045–1.190)  |
| LINC00893      | <0.001 | 1.686(1.281–2.220)  |
| PELATON        | <0.001 | 1.212(1.082–1.358)  |
| AC007098.1     | <0.001 | 2.126(1.479–3.056)  |
| AL137186.2     | <0.001 | 2.169(1.594–2.952)  |
| LINC02609      | <0.001 | 1.465(1.226–1.751)  |
| HLA-DQB1-AS1   | 0.003  | 1.045(1.015–1.075)  |
| ARHGAP27P1-AS1 | <0.001 | 1.359(1.159–1.584)  |
| MYG1-AS1       | <0.001 | 1.752(1.511–2.031)  |
| PRKAR1B-AS1    | <0.001 | 1.186(1.104–1.274)  |
| MALAT1         | <0.001 | 1.011(1.005–1.016)  |
| LINC00342      | <0.001 | 1.263(1.167–1.367)  |

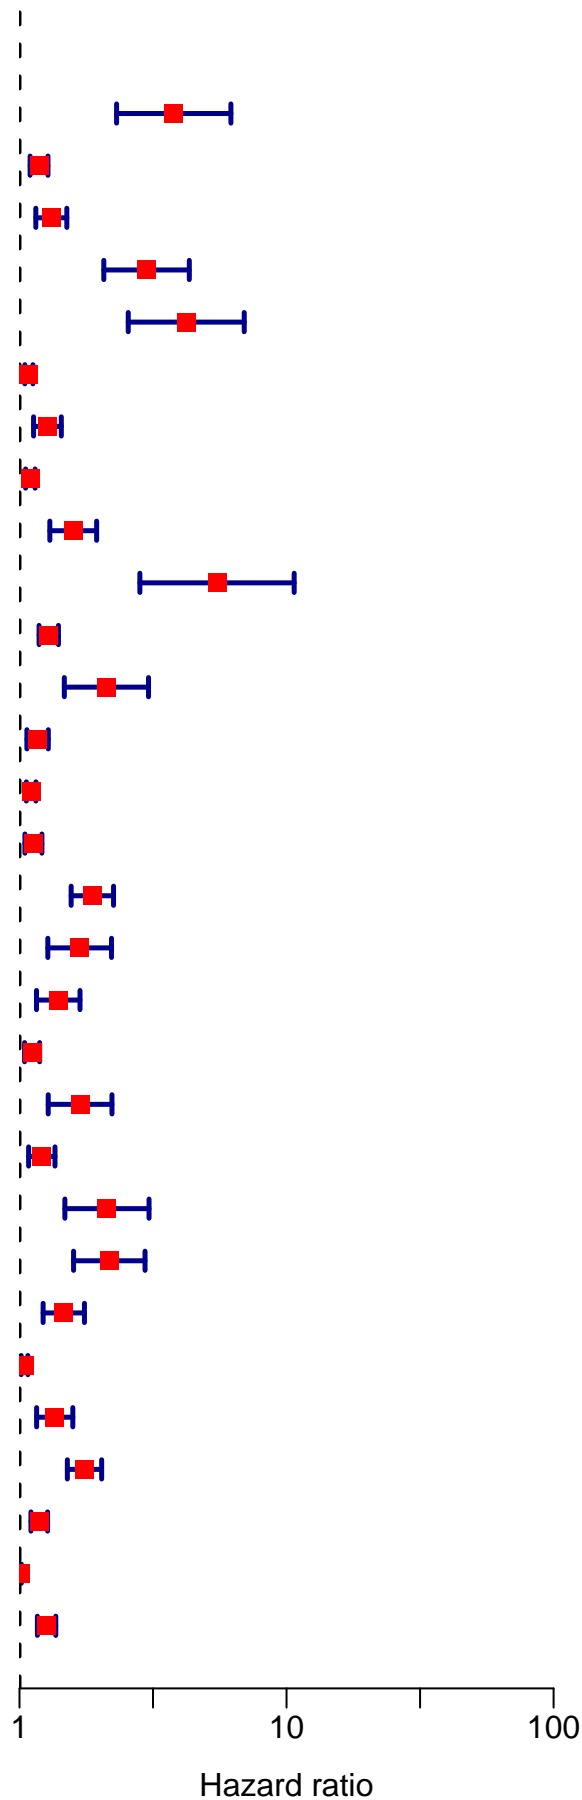

Supplement: code2.zip [file code2.zip]
