# Supplementary material for: Identification and validation of a ferroptosis-related lncRNA signature to robustly predict the prognosis, immune microenvironment, and immunotherapy efficiency in patients with clear cell renal cell carcinoma
Source: PeerJ journal article supplement (doi:10.7717/peerj.14506), 2022-12-19
Supplement: code2.zip [file code2.zip]

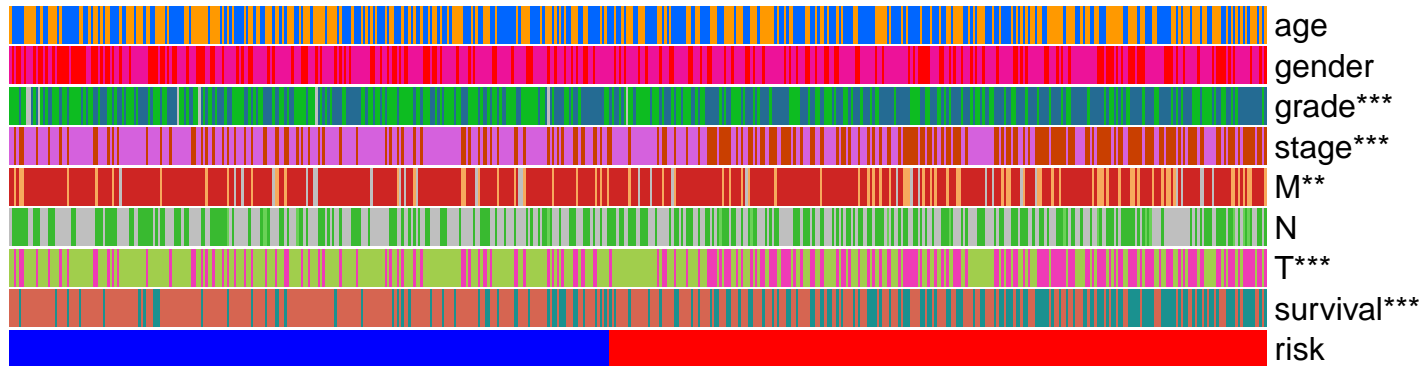

**age**

≤60  
>60

**gender**

Female  
Male

**grade\*\*\***

G1–G2  
G3–G4  
Unknown

**stage\*\*\***

I–II  
III–IV

**M\*\***

M0  
M1  
Unknown

**N**

N0  
N1  
Unknown

**T\*\*\***

I–II  
III–IV

**survival\*\*\***

Alive  
Dead

**risk**

low  
high
