# Supplementary material for: Identification and validation of a ferroptosis-related lncRNA signature to robustly predict the prognosis, immune microenvironment, and immunotherapy efficiency in patients with clear cell renal cell carcinoma
Source: PeerJ journal article supplement (doi:10.7717/peerj.14506), 2022-12-19

**A**

|           | pvalue | Hazard ratio       |
|-----------|--------|--------------------|
| age       | 0.001  | 1.030(1.012-1.049) |
| gender    | 0.487  | 0.852(0.543-1.337) |
| grade     | <0.001 | 2.069(1.583-2.704) |
| stage     | <0.001 | 1.964(1.629-2.368) |
| M         | 0.001  | 1.733(1.238-2.427) |
| N         | 0.922  | 0.989(0.797-1.228) |
| T         | <0.001 | 2.025(1.593-2.573) |
| riskScore | <0.001 | 1.137(1.104-1.170) |

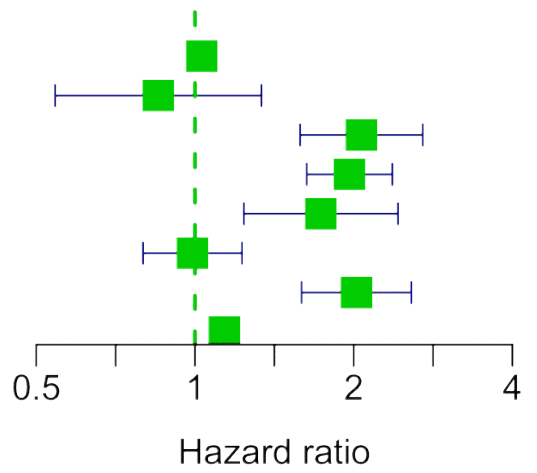**B**

|           | pvalue | Hazard ratio       |
|-----------|--------|--------------------|
| age       | <0.001 | 1.033(1.014-1.053) |
| grade     | 0.013  | 1.488(1.087-2.037) |
| stage     | <0.001 | 2.302(1.473-3.595) |
| M         | 0.525  | 0.799(0.400-1.596) |
| T         | 0.081  | 0.657(0.410-1.053) |
| riskScore | <0.001 | 1.129(1.092-1.167) |

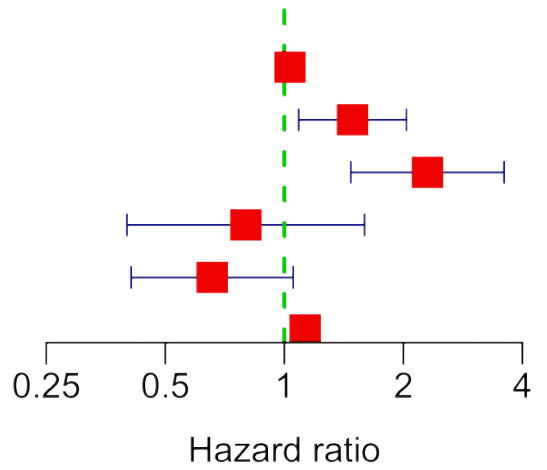**C**

|           | pvalue | Hazard ratio       |
|-----------|--------|--------------------|
| age       | 0.001  | 1.031(1.012-1.050) |
| gender    | 0.206  | 1.323(0.857-2.041) |
| grade     | <0.001 | 1.784(1.412-2.254) |
| stage     | <0.001 | 1.864(1.549-2.243) |
| M         | <0.001 | 2.801(2.029-3.868) |
| N         | 0.072  | 0.822(0.664-1.017) |
| T         | <0.001 | 1.894(1.506-2.383) |
| riskScore | <0.001 | 2.254(1.425-3.564) |

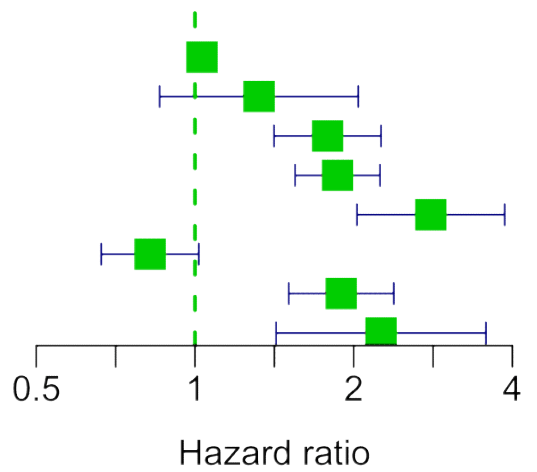**D**

|           | pvalue | Hazard ratio       |
|-----------|--------|--------------------|
| age       | 0.002  | 1.034(1.012-1.056) |
| grade     | 0.013  | 1.449(1.083-1.938) |
| stage     | 0.012  | 2.114(1.178-3.795) |
| M         | 0.669  | 1.152(0.602-2.206) |
| T         | 0.145  | 0.637(0.347-1.169) |
| riskScore | 0.010  | 1.860(1.162-2.977) |

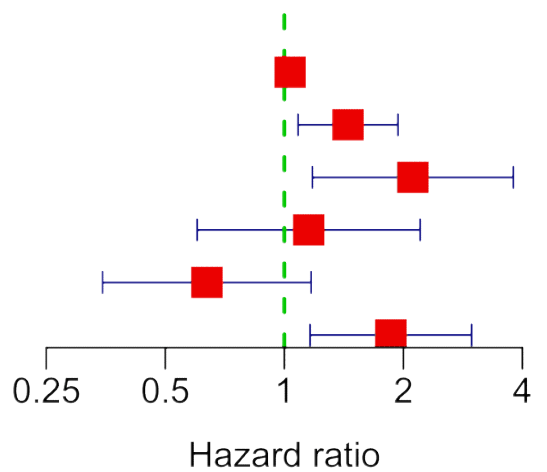

Supplement: Figure_S3.pdf [file Figure_S3.pdf]
