# Supplementary material for: Identification and validation of a ferroptosis-related lncRNA signature to robustly predict the prognosis, immune microenvironment, and immunotherapy efficiency in patients with clear cell renal cell carcinoma
Source: PeerJ. 2022 Dec 19;10:e14506. doi: 10.7717/peerj.14506 (PMC9774008; doi:10.7717/peerj.14506)
Supplement: Table S2 [file peerj-10-14506-s005.xlsx]

## Sheet: Sheet1
Table S2. Raw data for realtime PCR results
Group	sample	lable	GAPDH	LINC00894	LINC01426	PVT1	DUXAP8
786-O	sample1	1	20.4975	18.6781	18.4055	18.6603	18.1499
786-O	sample1	2	20.1365	18.8161	18.6793	19.1597	17.9878
786-O	sample1	3	20.6052	18.6772	18.6547	18.9664	18.0928
786-O	sample2	1	20.5027	19.0092	18.2115	18.8019	17.9017
786-O	sample2	2	20.0157	18.4769	18.48	18.4006	18.8998
786-O	sample2	3	20.9431	18.4812	18.3672	18.9567	18.595
786-O	sample3	1	20.0993	18.6864	18.1748	18.697	18.0926
786-O	sample3	2	20.6426	18.9872	18.1165	19.1277	18.481
786-O	sample3	3	20.1772	18.7839	18.8939	18.433	18.1749
Caki-1	sample1	1	20.1301	19.1798	19.1782	19.137	18.6782
Caki-1	sample1	2	20.9736	19.3367	19.4328	19.5357	18.9328
Caki-1	sample1	3	20.8356	18.9137	19.233	18.9483	18.733
Caki-1	sample2	1	20.0576	19.4268	19.2114	19.8549	18.7114
Caki-1	sample2	2	20.5181	19.7569	19.1599	18.9754	18.6599
Caki-1	sample2	3	20.3745	19.3564	19.4003	19.5043	18.9003
Caki-1	sample3	1	20.7264	18.9718	19.3919	19.4089	18.8919
Caki-1	sample3	2	20.6385	18.9747	19.3851	19.0799	18.8851
Caki-1	sample3	3	20.4767	18.9876	19.2246	19.0544	18.7246
HK-2	sample1	1	20.8434	20.4025	20.114	20.7984	20.8345
HK-2	sample1	2	20.3535	20.534	20.3096	20.7075	21.0522
HK-2	sample1	3	20.6402	20.9291	20.2999	20.6857	20.3723
HK-2	sample2	1	20.0328	20.0199	20.1991	20.1686	21.1534
HK-2	sample2	2	20.3622	20.8223	20.3193	20.6075	21.1509
HK-2	sample2	3	20.5424	20.2173	20.0257	20.8302	20.7839
HK-2	sample3	1	20.8174	20.1647	20.4101	20.8611	20.584
HK-2	sample3	2	20.0491	20.7513	20.2003	20.5866	20.8624
HK-2	sample3	3	20.2355	20.1732	20.2104	20.4389	21.1345
