# Supplementary figures and images for: Identification and validation of a ferroptosis-related lncRNA signature to robustly predict the prognosis, immune microenvironment, and immunotherapy efficiency in patients with clear cell renal cell carcinoma
Source: PeerJ journal article supplement (doi:10.7717/peerj.14506), 2022-12-19

# Patients with T1-2

Risk  high  low

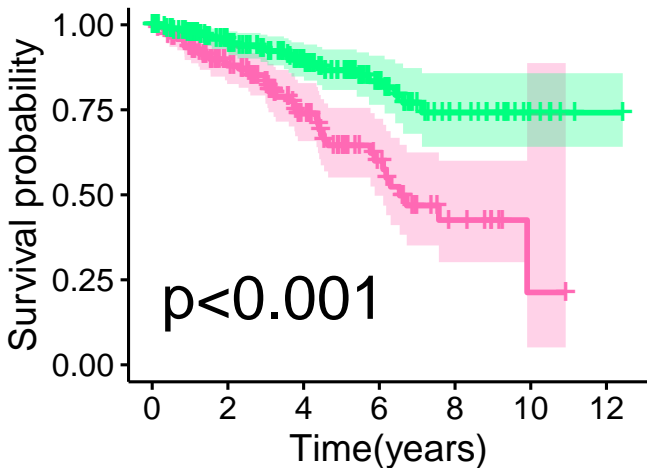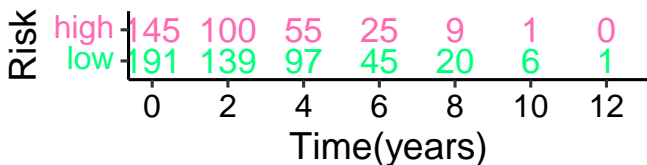

Supplement: code2.zip [file code2.zip]

Risk  low  high

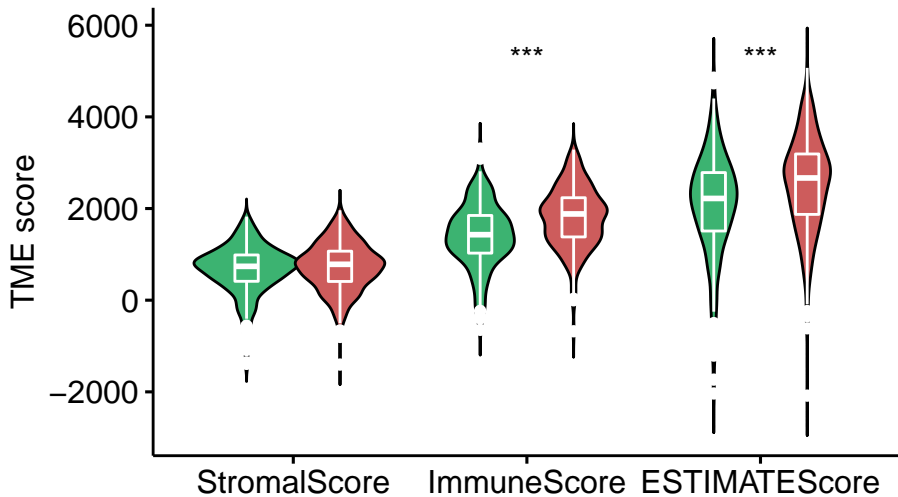

Supplement: code2.zip [file code2.zip]

gender Female Male

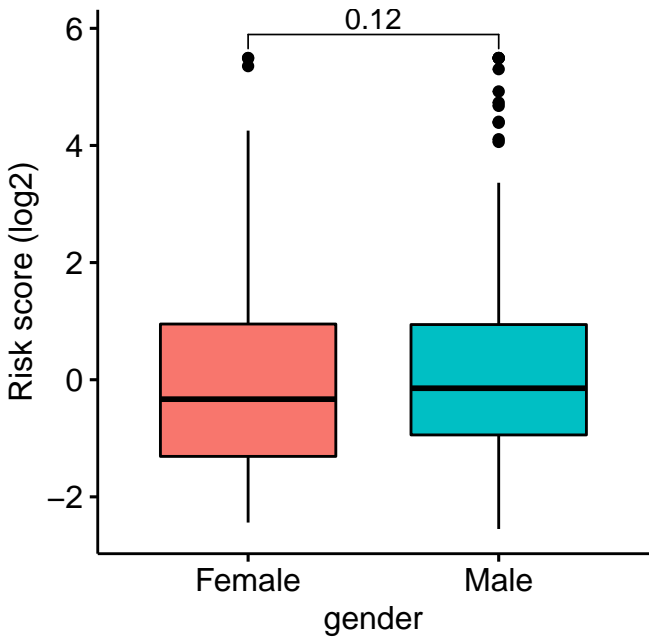

Supplement: code2.zip [file code2.zip]

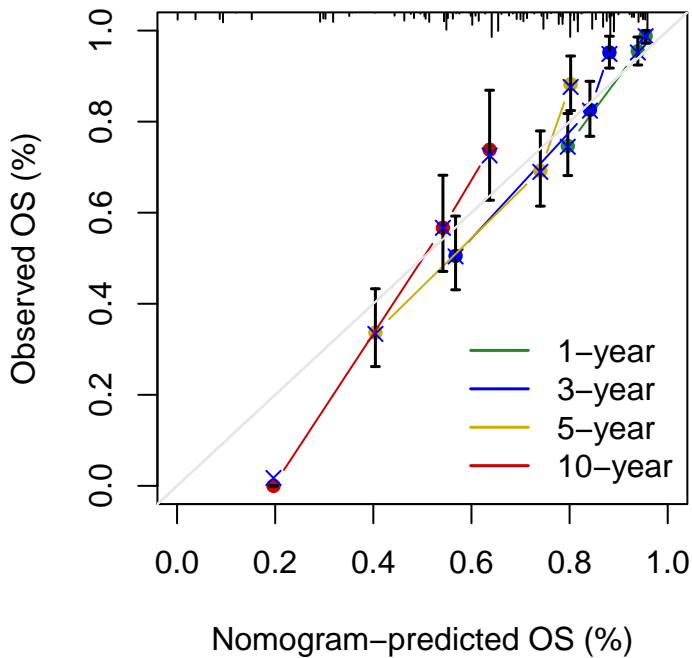

Supplement: code2.zip [file code2.zip]

Risk score

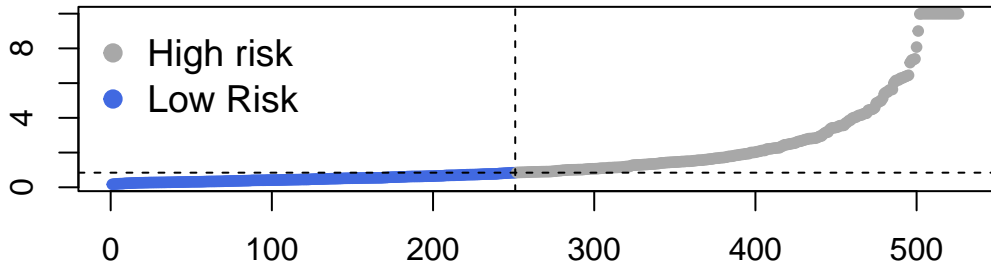

Patients (increasing risk socre)

Supplement: code2.zip [file code2.zip]

# Patients with Stage I–II

Risk  high  low

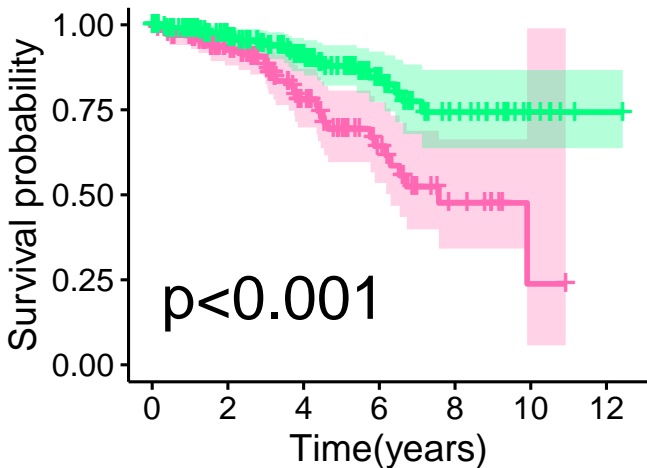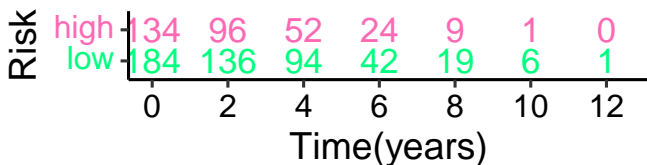

Supplement: code2.zip [file code2.zip]

# Patients with G1-2

Risk  high  low

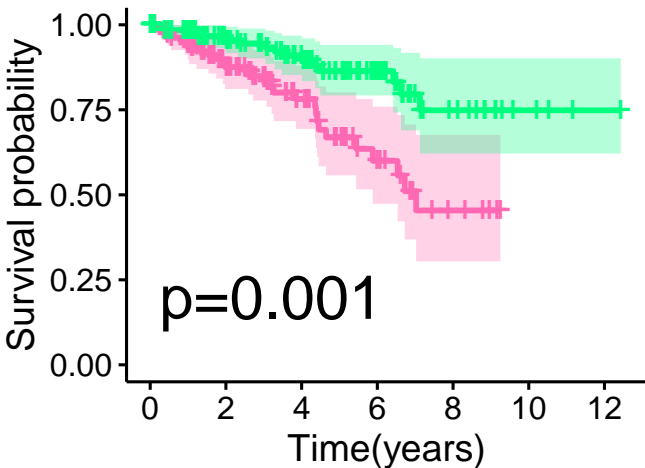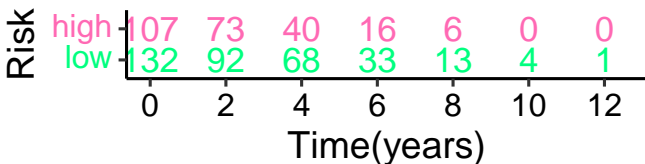

Supplement: code2.zip [file code2.zip]

Overall survival

Risk + High risk + Low risk

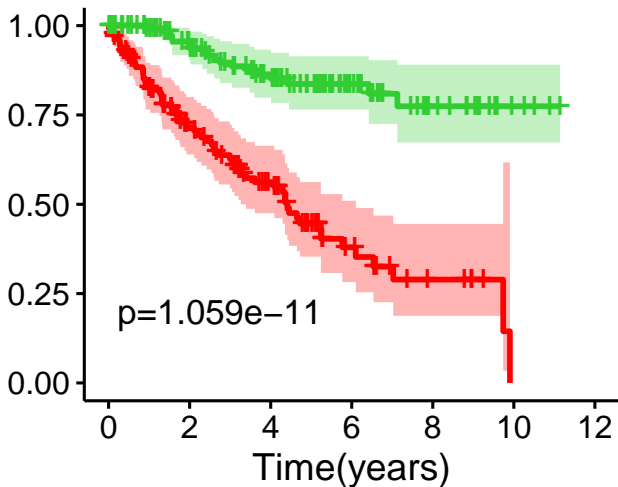

Risk

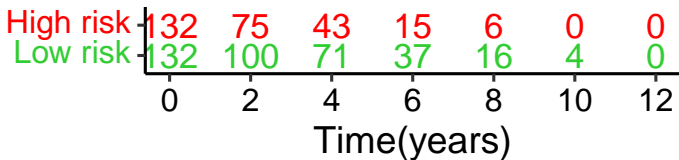

Supplement: code2.zip [file code2.zip]

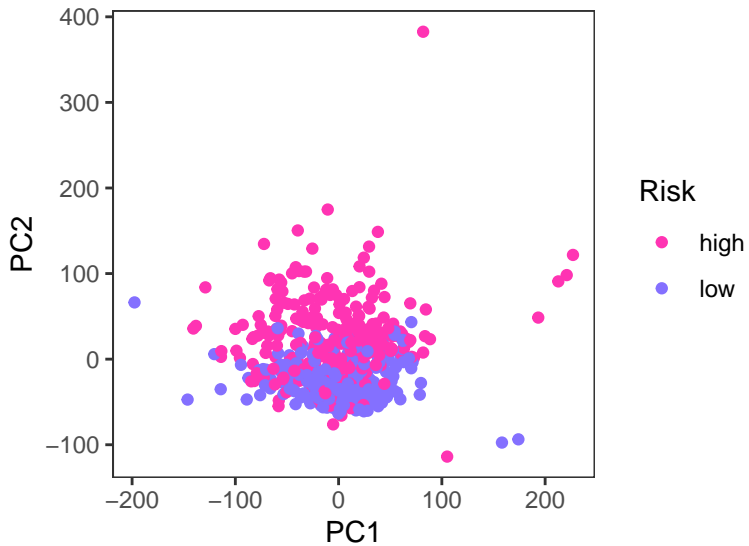

Supplement: code2.zip [file code2.zip]

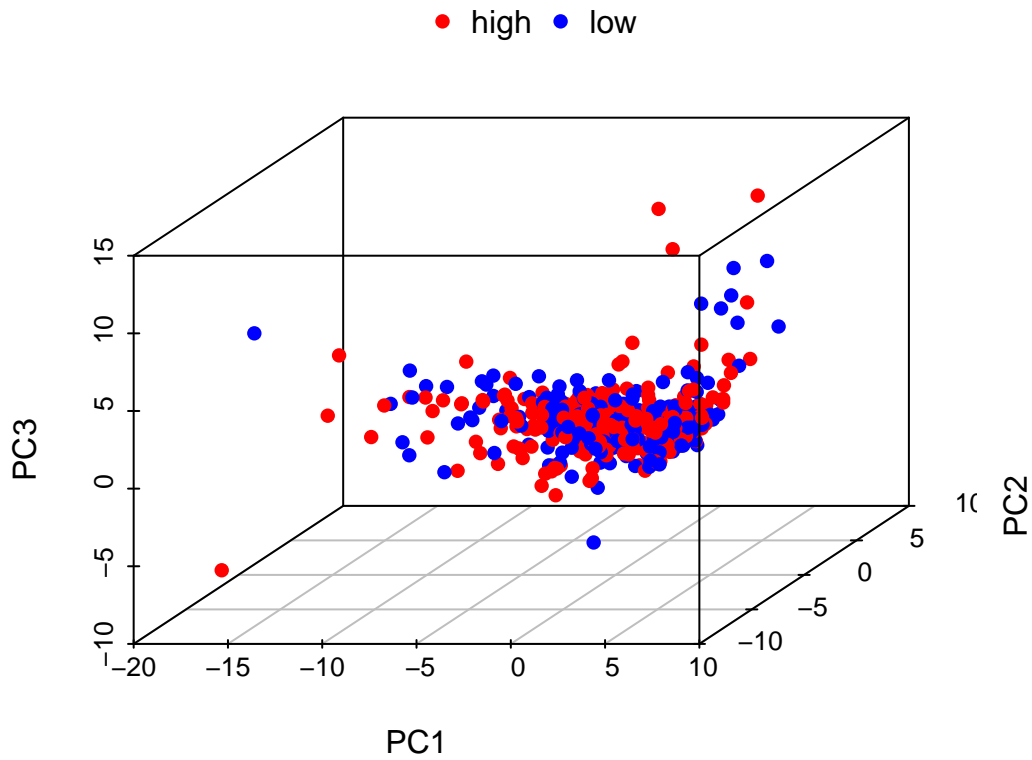

Supplement: code2.zip [file code2.zip]

Response  Responder  Non-responder

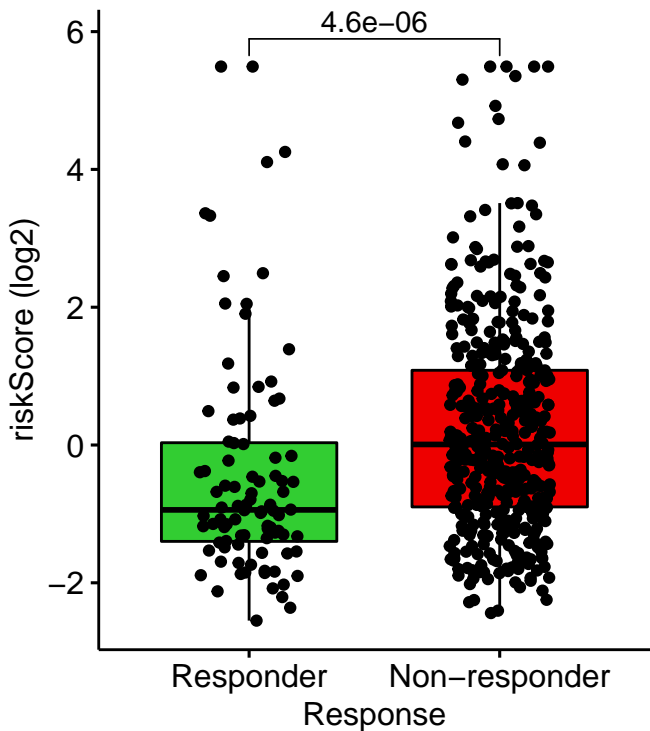

Supplement: code2.zip [file code2.zip]

# Patients with Male

Risk  high  low

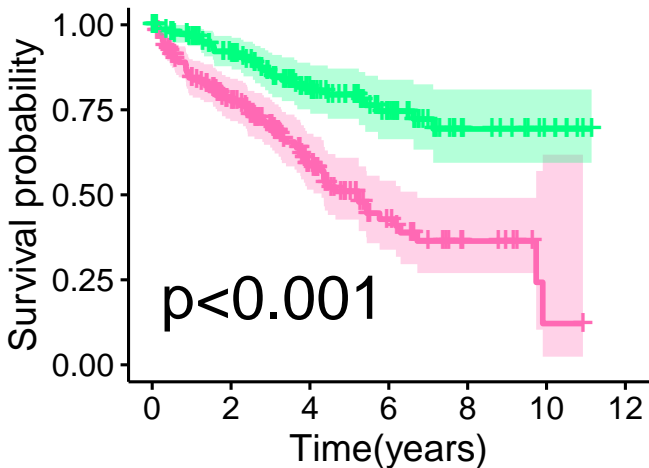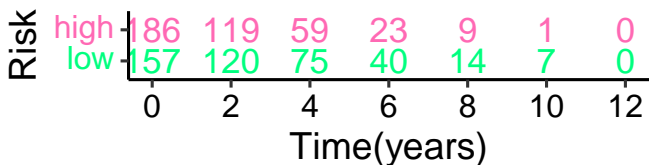

Supplement: code2.zip [file code2.zip]

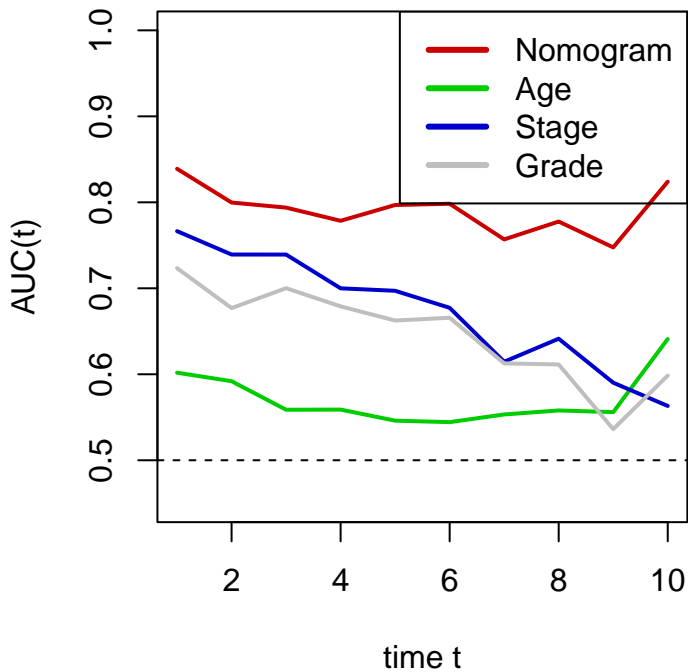

Supplement: code2.zip [file code2.zip]

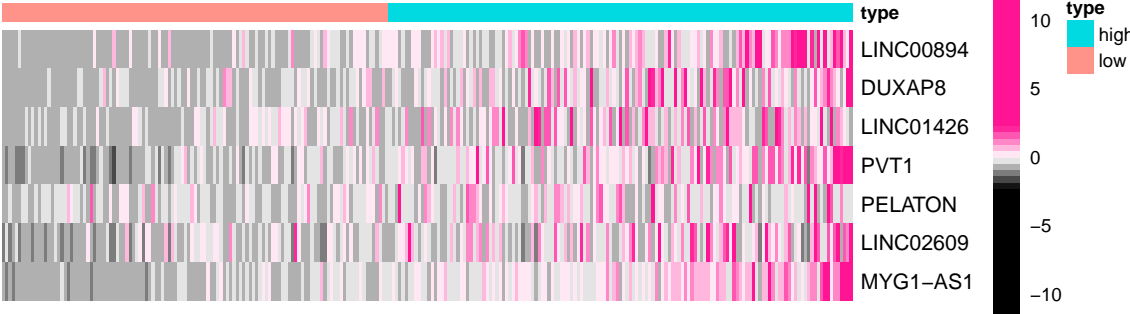

Supplement: code2.zip [file code2.zip]

# Patients with Stage III–IV

Risk  high  low

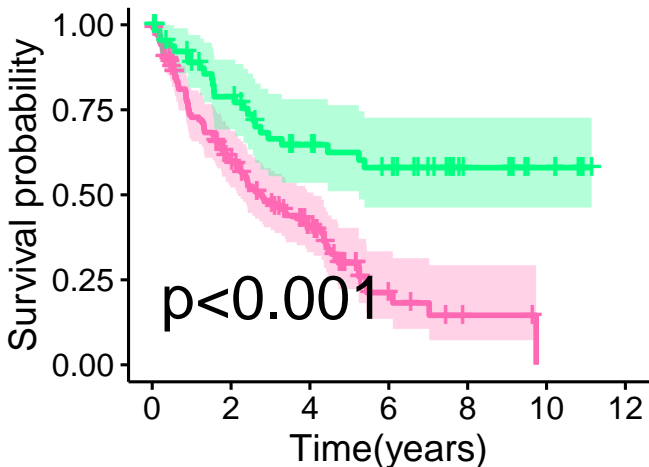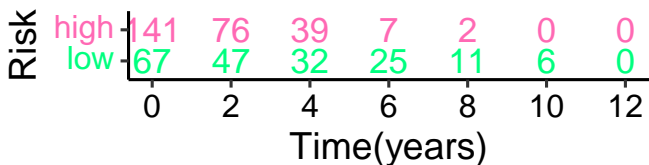

Supplement: code2.zip [file code2.zip]

Immune subtype C1 C2 C3 C4 C6

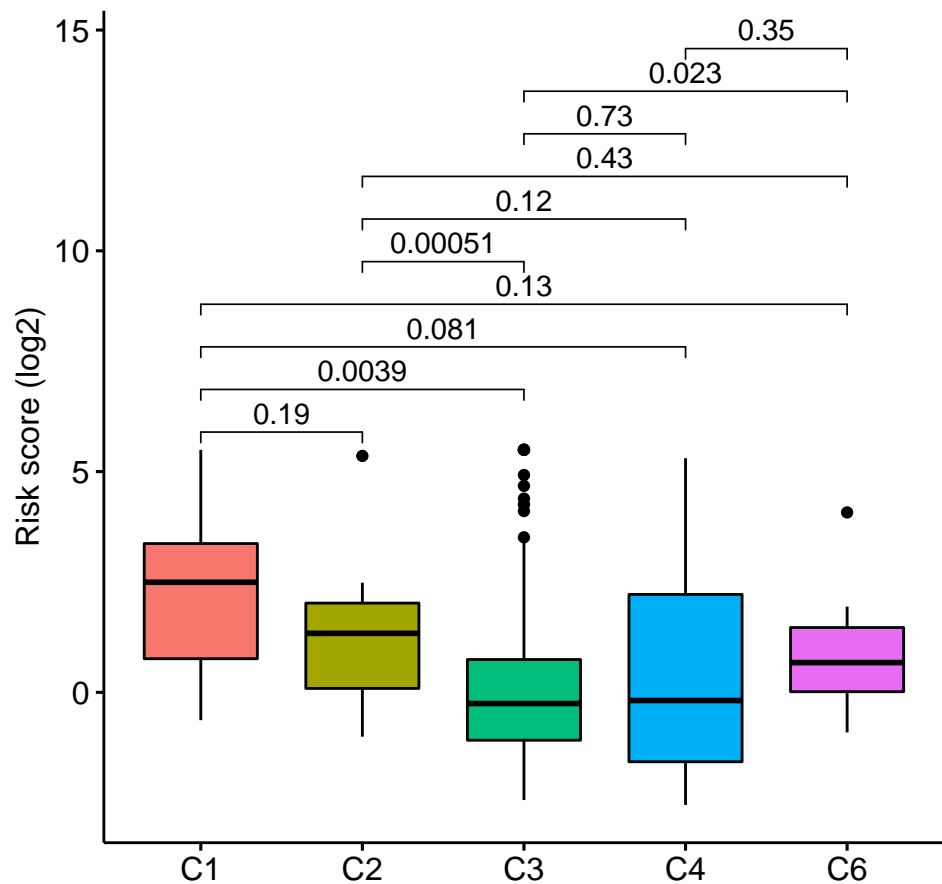

Supplement: code2.zip [file code2.zip]

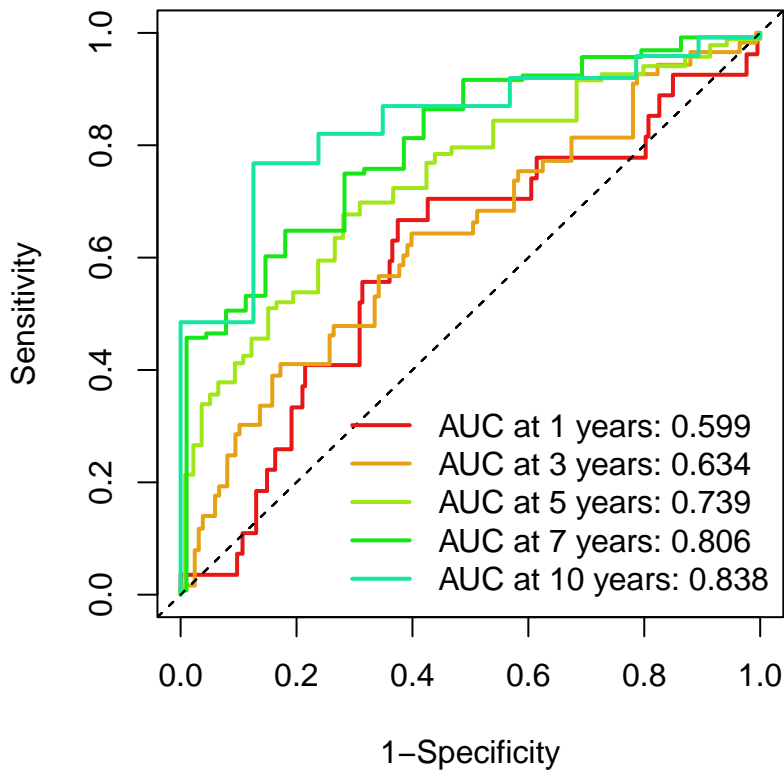

Supplement: code2.zip [file code2.zip]

Partial Likelihood Deviance

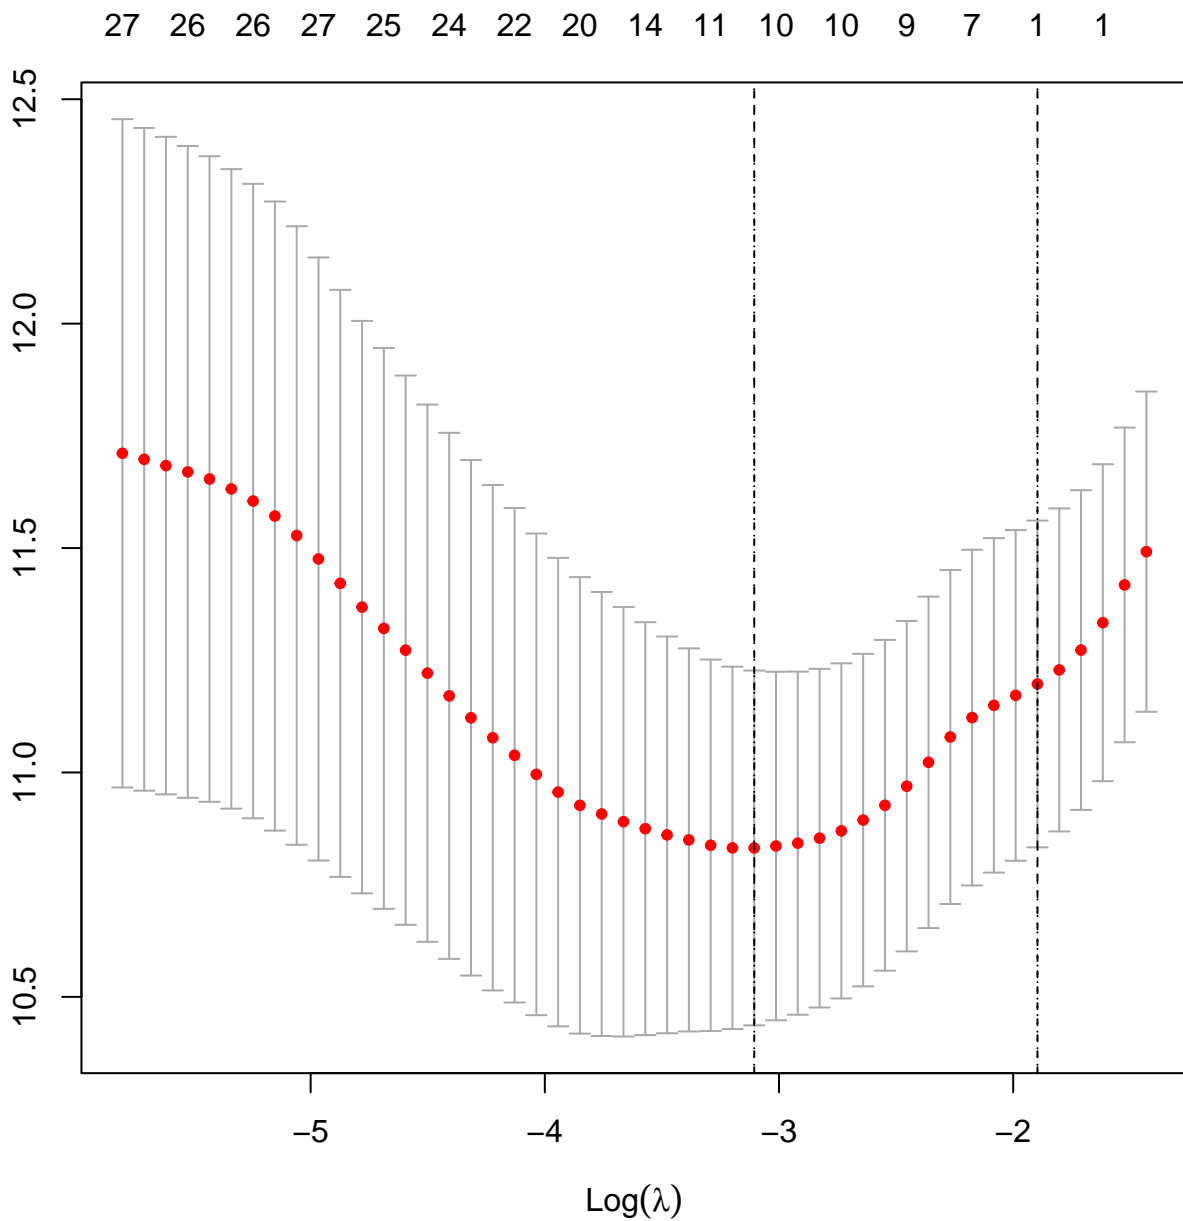

Supplement: code2.zip [file code2.zip]

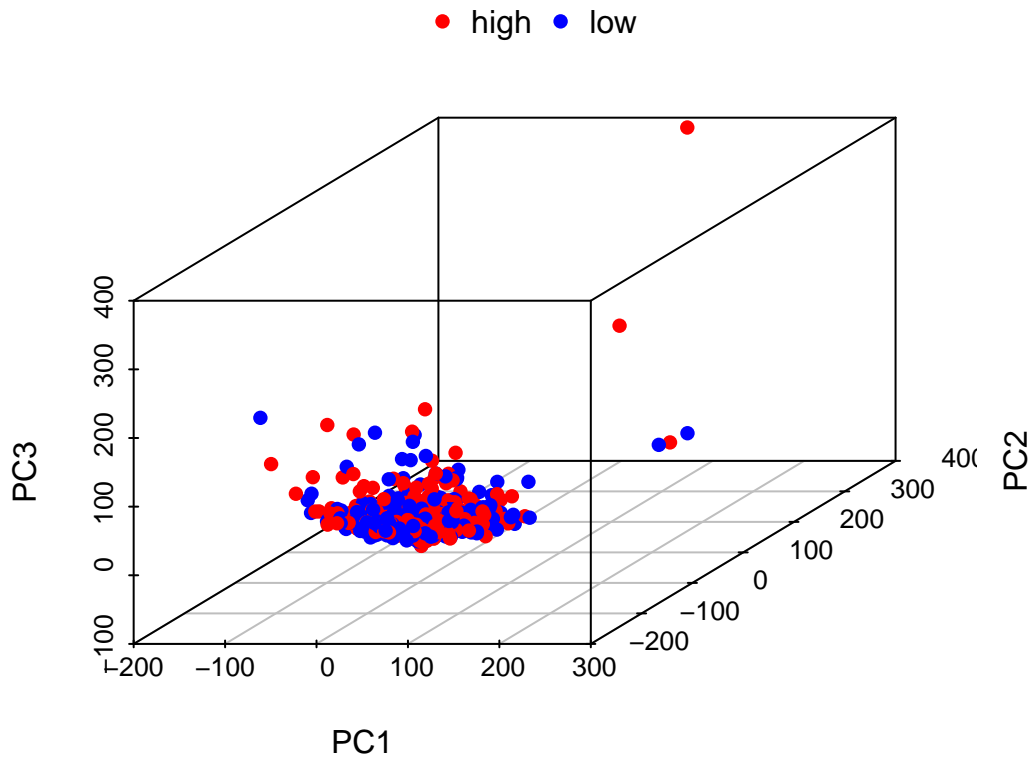

Supplement: code2.zip [file code2.zip]

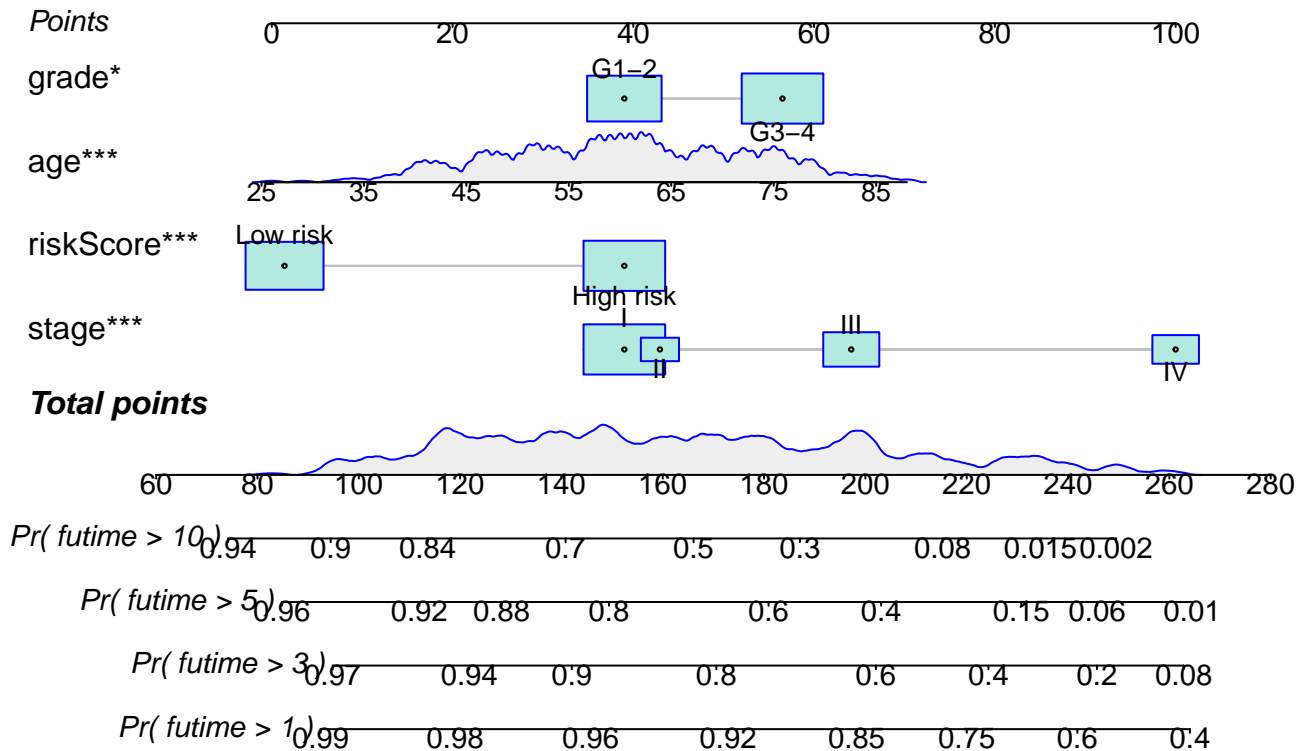

Supplement: code2.zip [file code2.zip]

Overall survival

Risk  High risk  Low risk

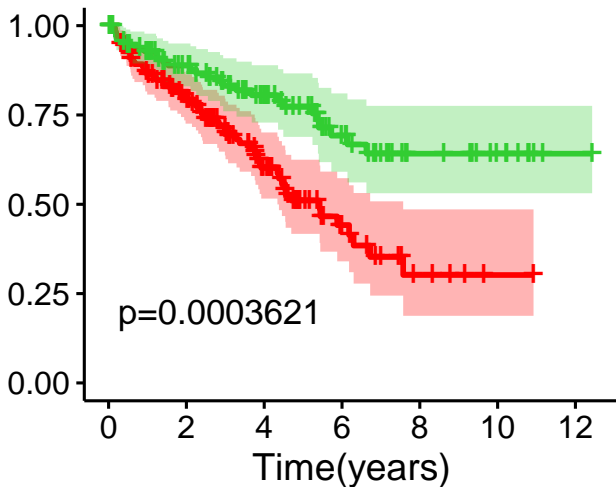

Risk

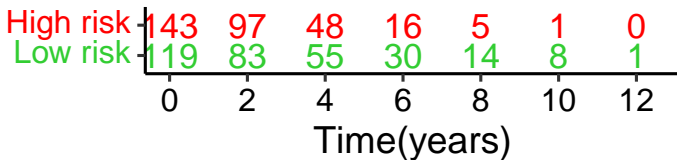

Supplement: code2.zip [file code2.zip]

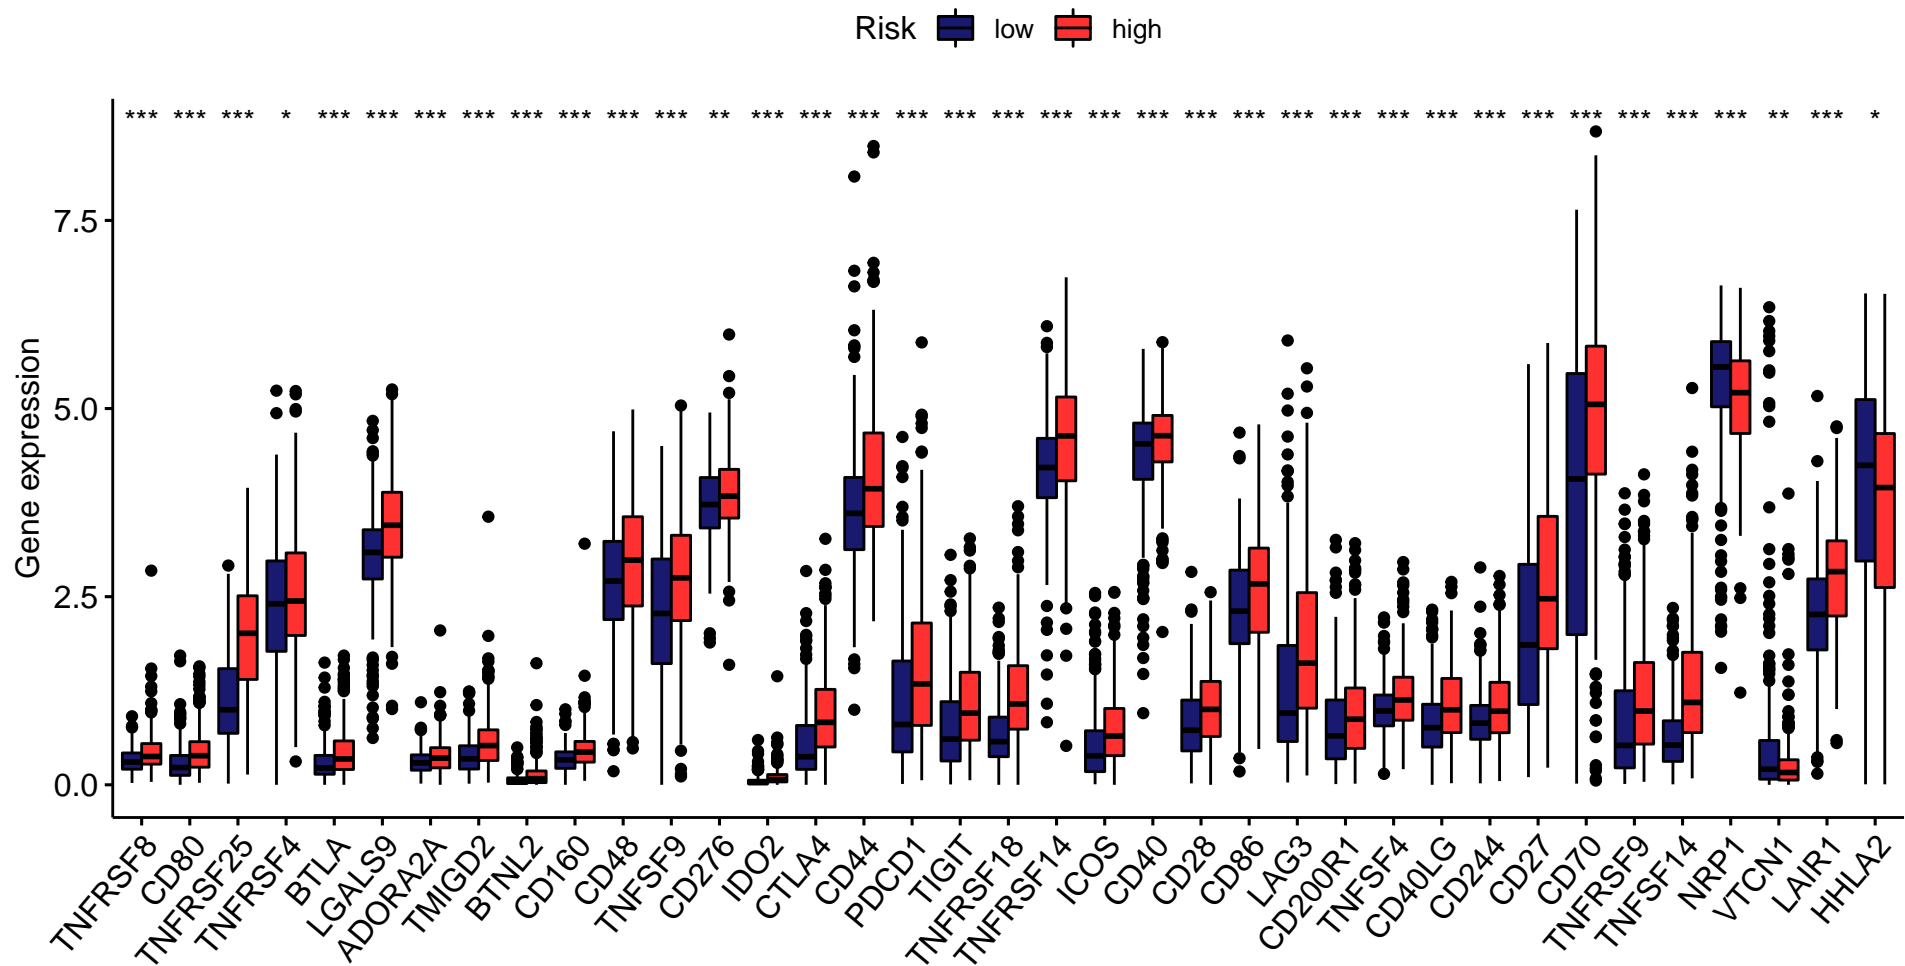

Supplement: code2.zip [file code2.zip]

risk high low

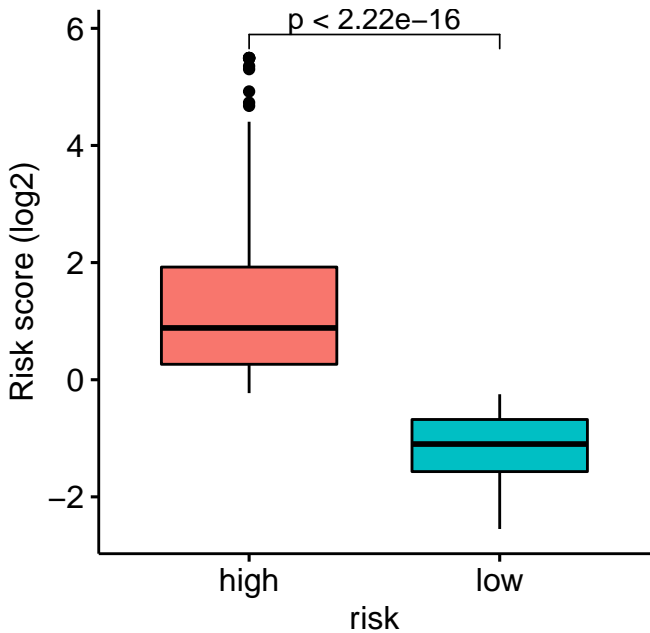

Supplement: code2.zip [file code2.zip]

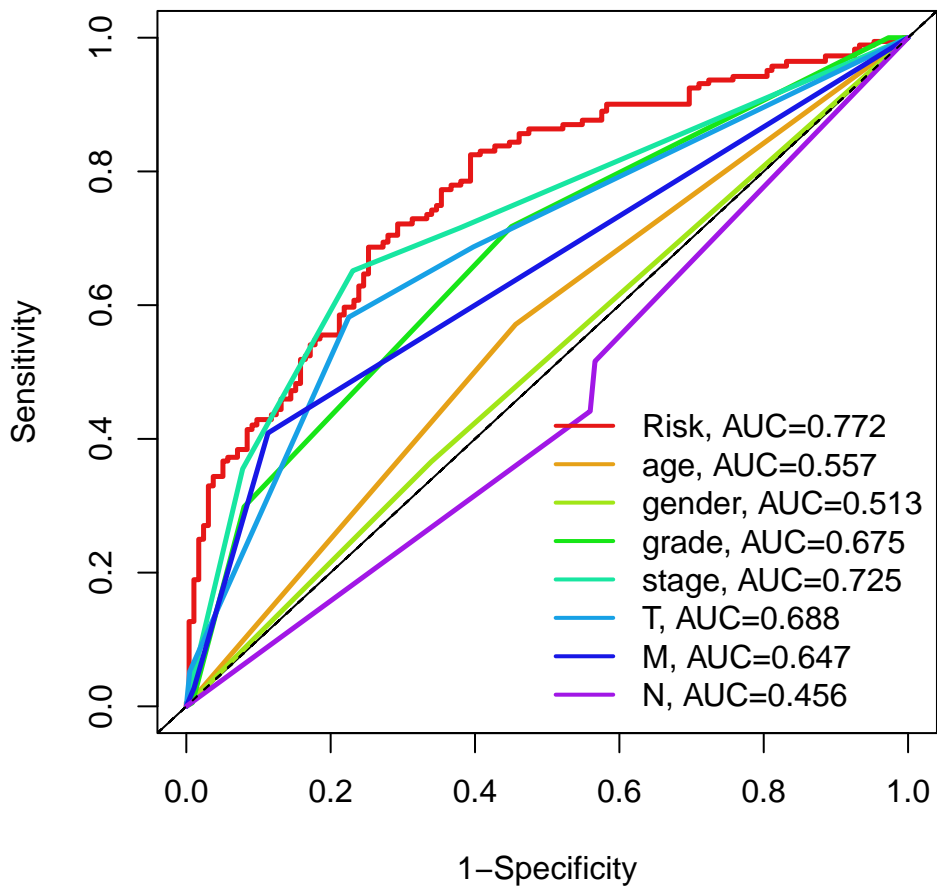

Supplement: code2.zip [file code2.zip]

Survival time (years)

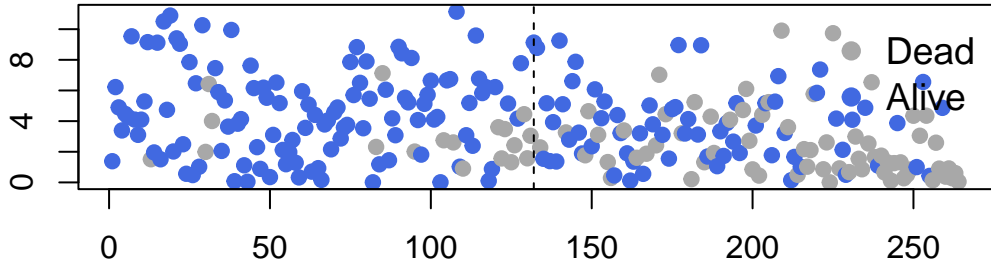

Patients (increasing risk socre)

Supplement: code2.zip [file code2.zip]

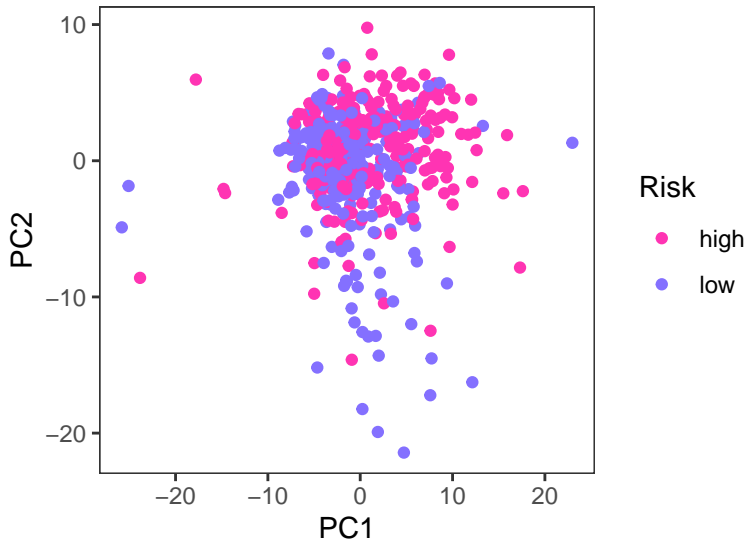

Supplement: code2.zip [file code2.zip]

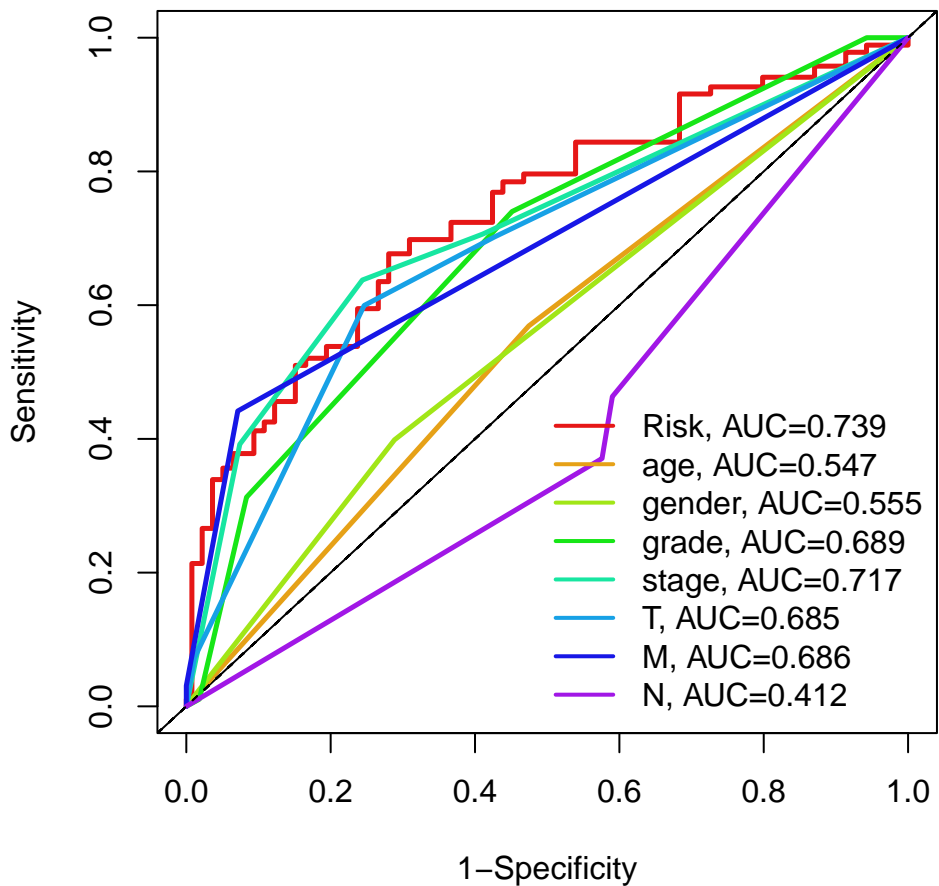

Supplement: code2.zip [file code2.zip]

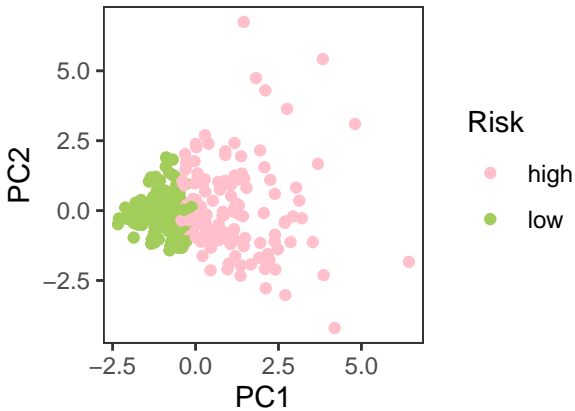

Supplement: code2.zip [file code2.zip]

# Patients with age>60 years

Risk + high + low

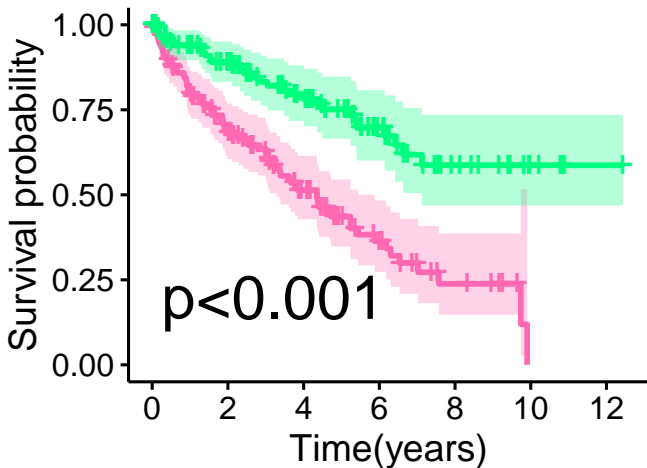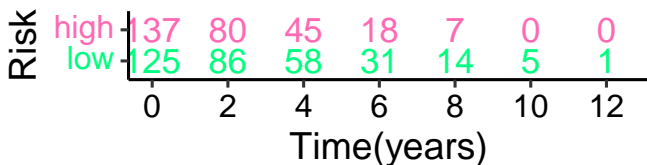

Supplement: code2.zip [file code2.zip]

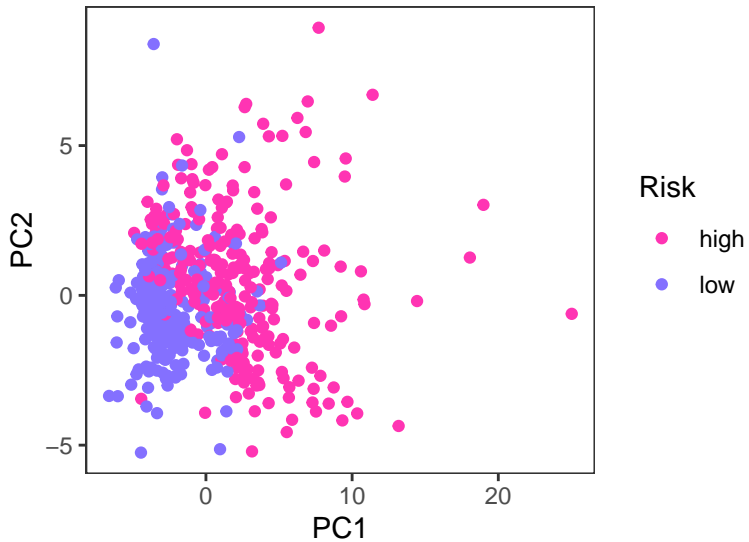

Supplement: code2.zip [file code2.zip]

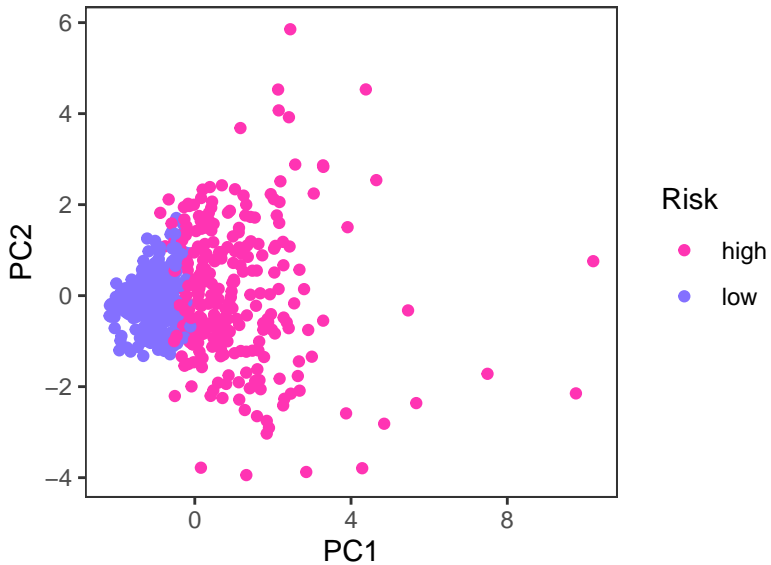

Supplement: code2.zip [file code2.zip]

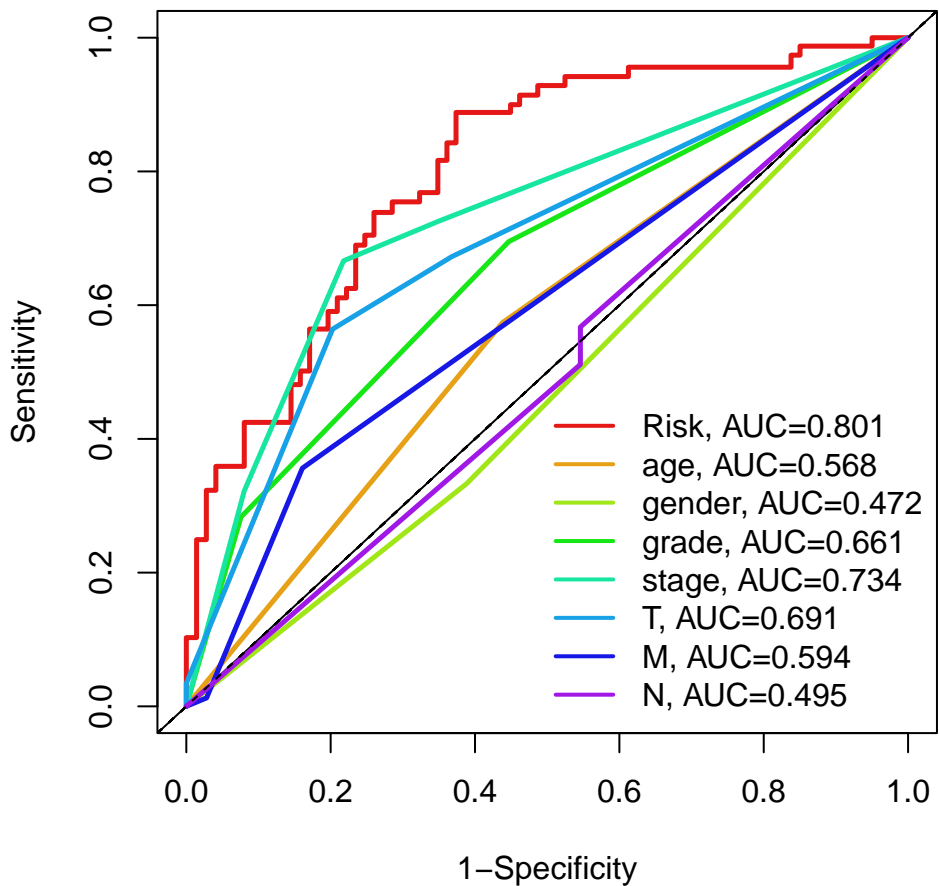

Supplement: code2.zip [file code2.zip]

# Patients with T3-4

Risk  high  low

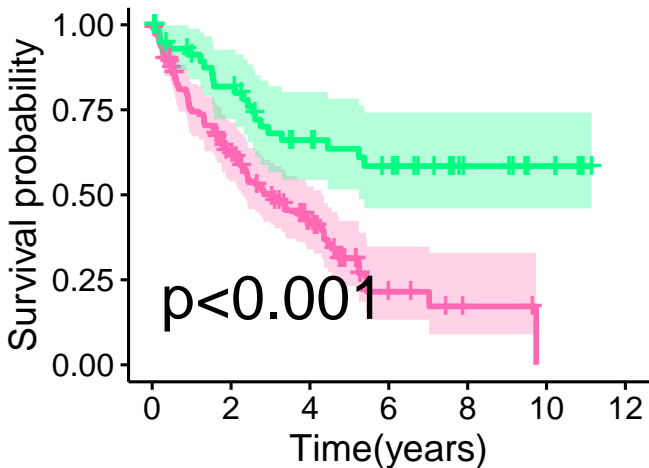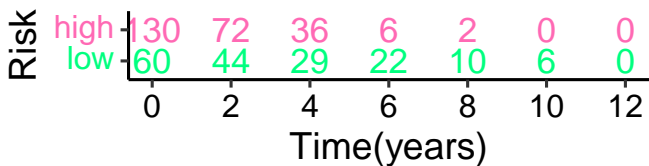

Supplement: code2.zip [file code2.zip]

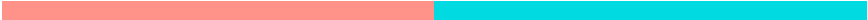

type

type

high  
low

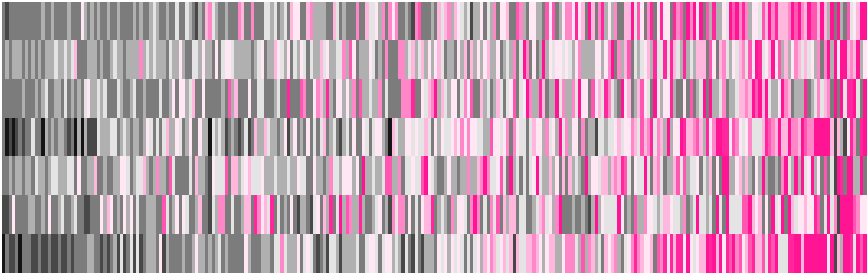

LINC00894

DUXAP8

LINC01426

PVT1

PELATON

LINC02609

MYG1-AS1

5

0

-5

Supplement: code2.zip [file code2.zip]

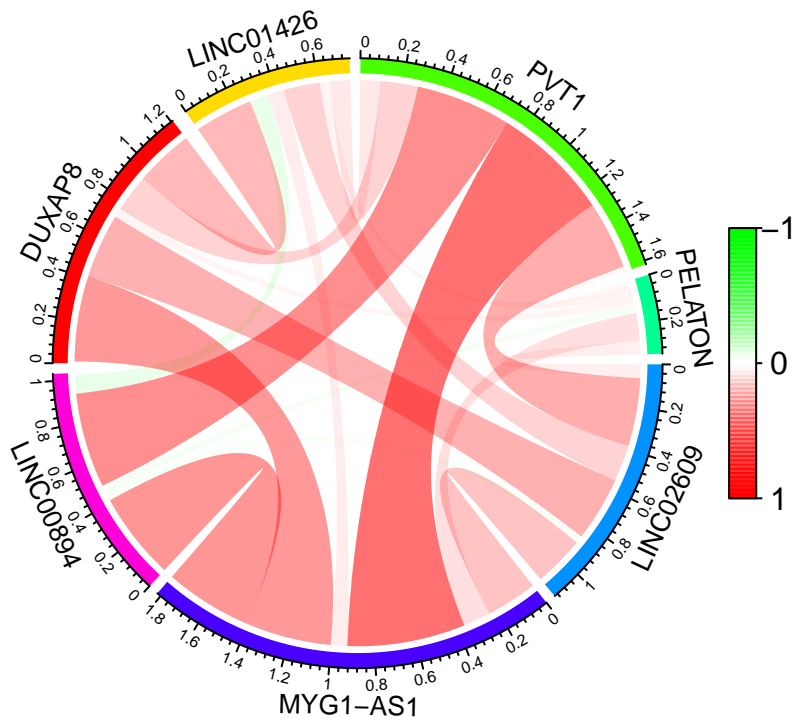

Supplement: code2.zip [file code2.zip]

# Patients with G3-4

Risk  high  low

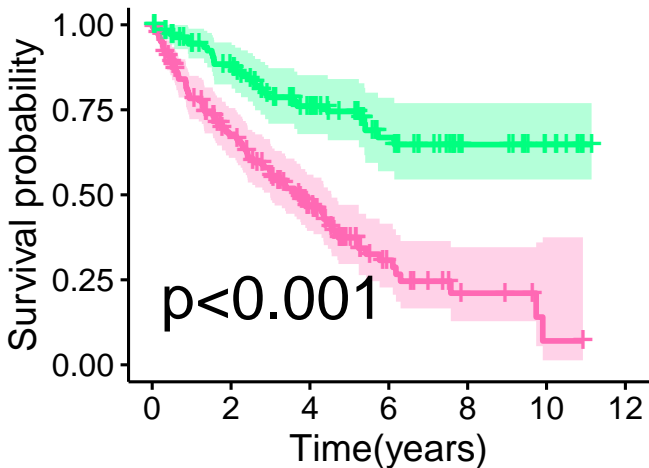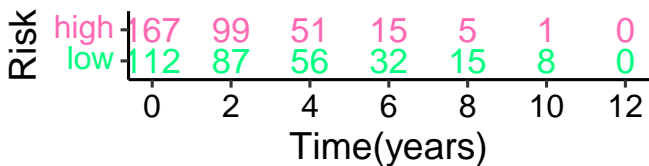

Supplement: code2.zip [file code2.zip]

age      $\leq 60$       $> 60$

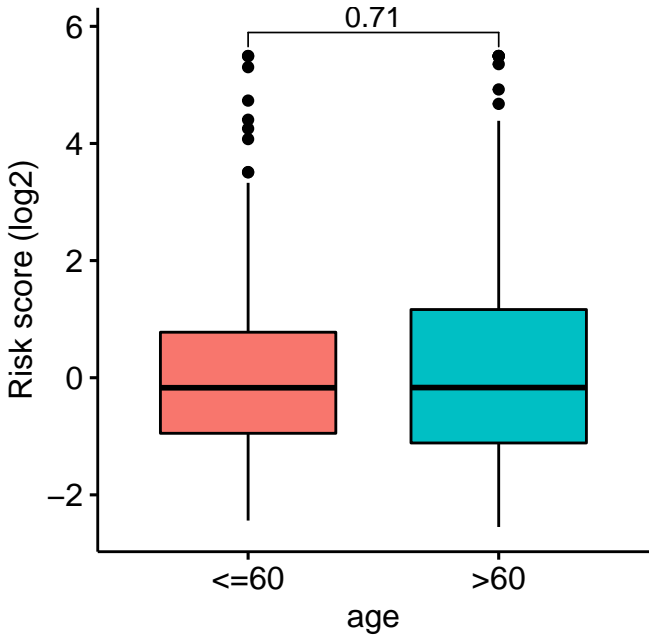

Supplement: code2.zip [file code2.zip]

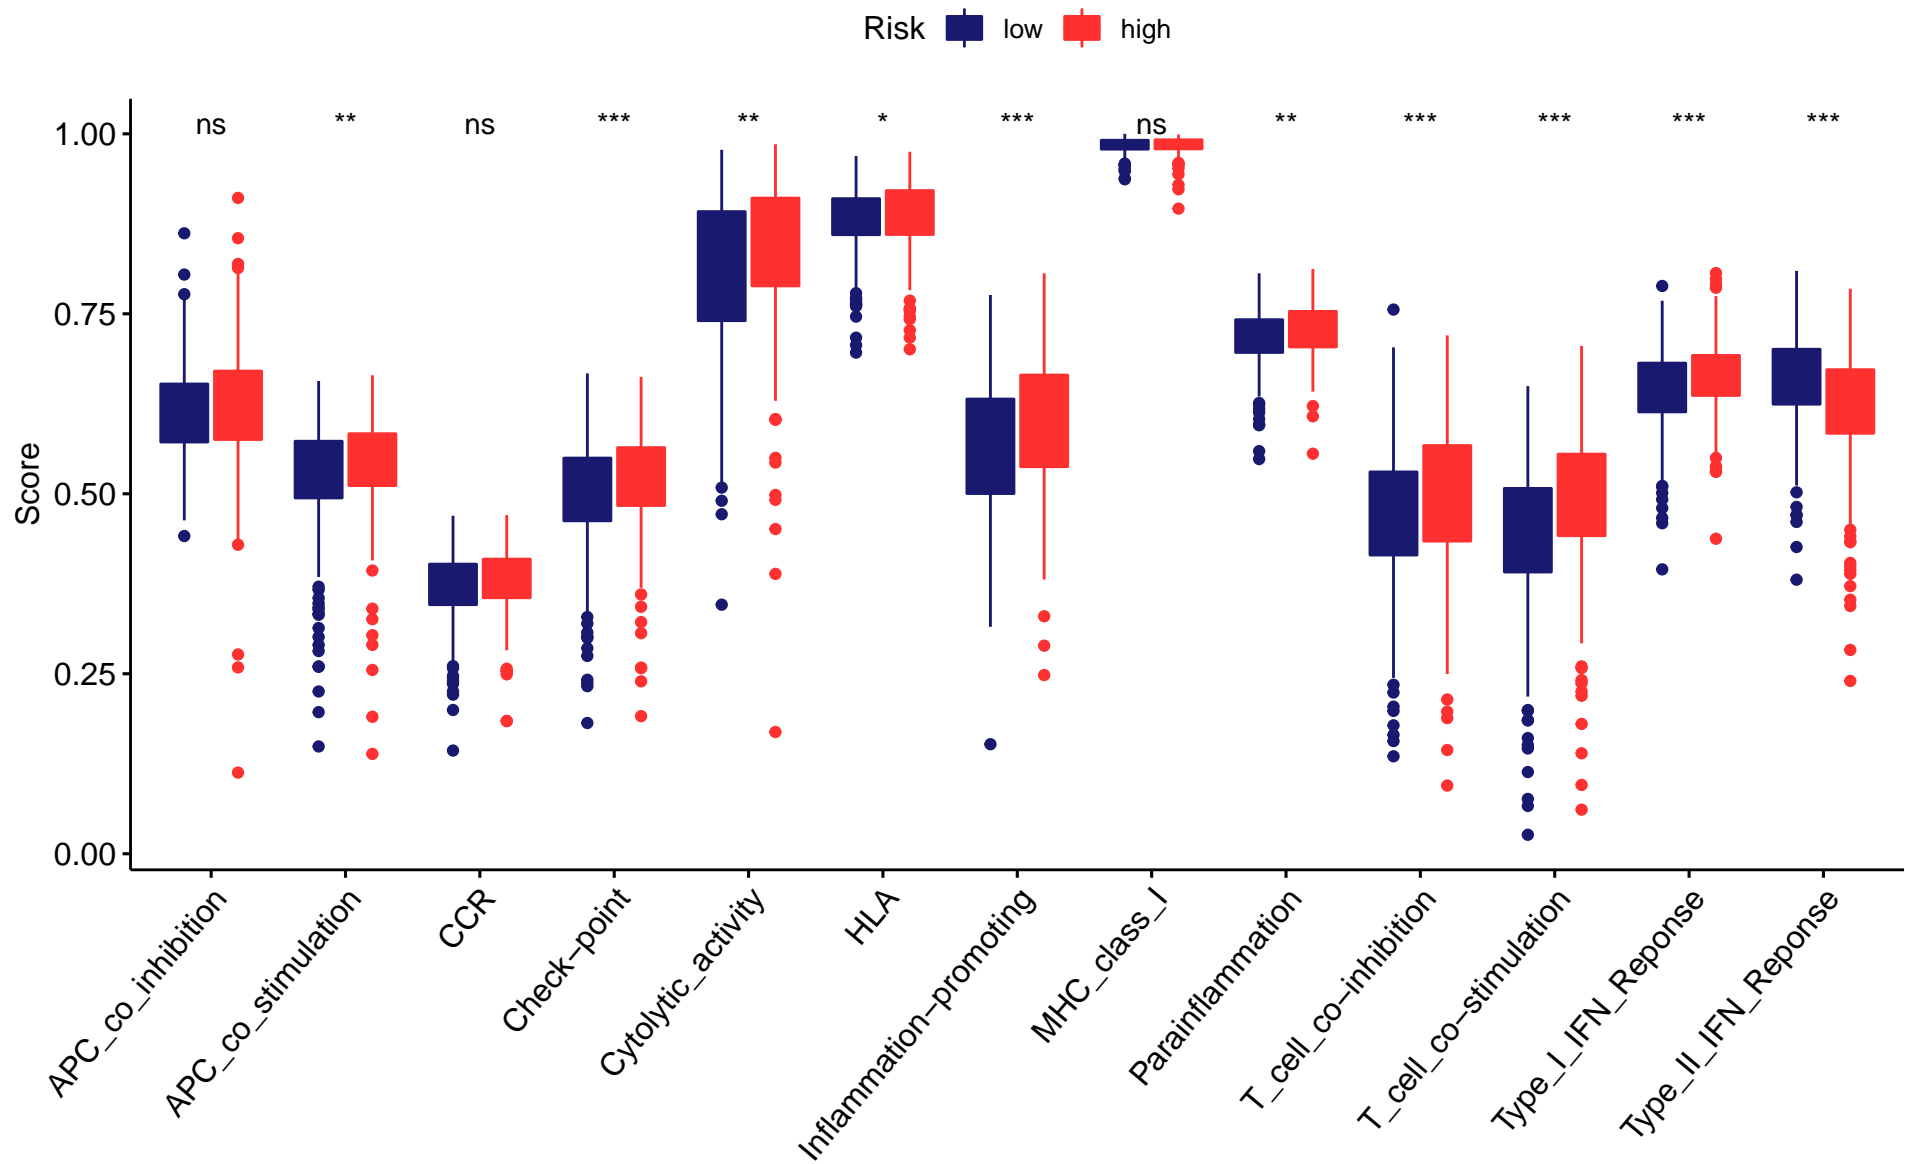

Supplement: code2.zip [file code2.zip]

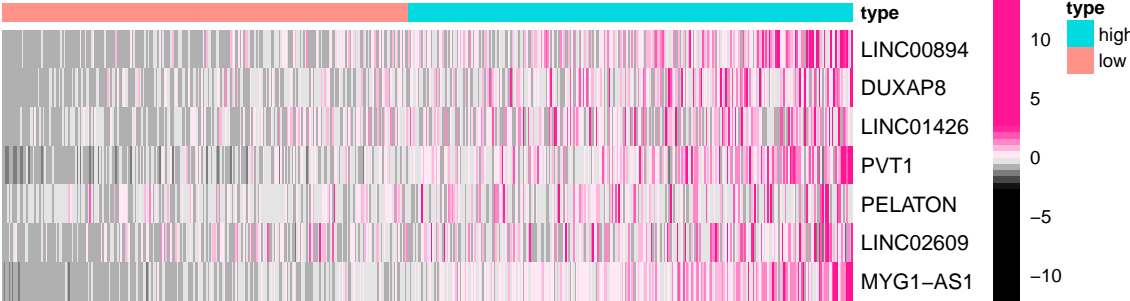

Supplement: code2.zip [file code2.zip]

risk High-risk Low-risk

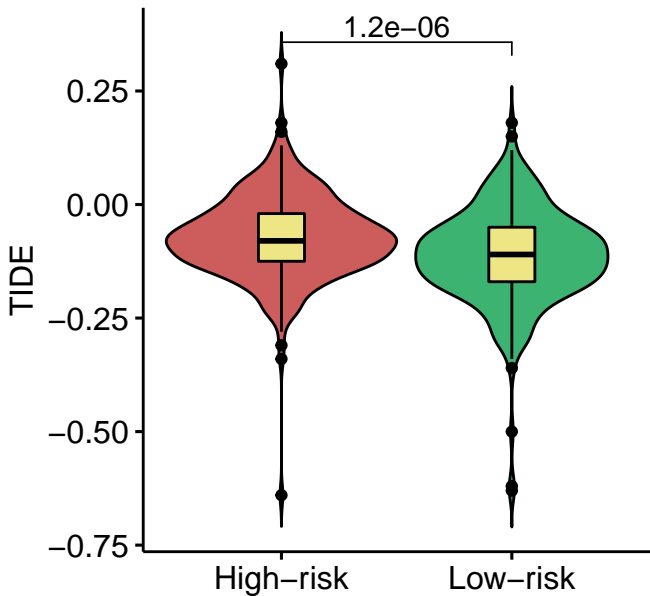

Supplement: code2.zip [file code2.zip]

grade  G1-G2  G3-G4  Unknown

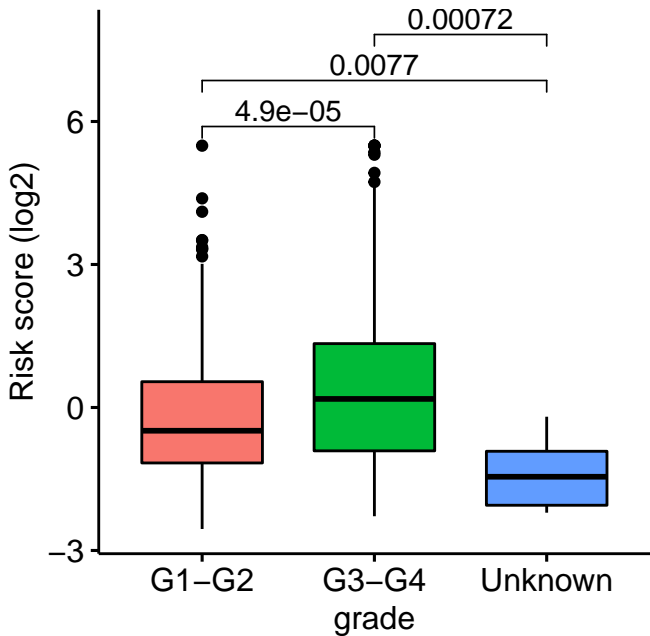

Supplement: code2.zip [file code2.zip]

Risk score

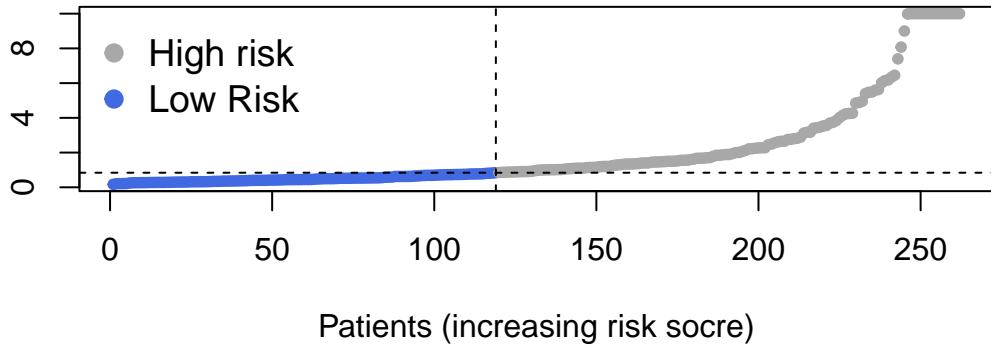

Supplement: code2.zip [file code2.zip]

# Patients with M0

Risk  high  low

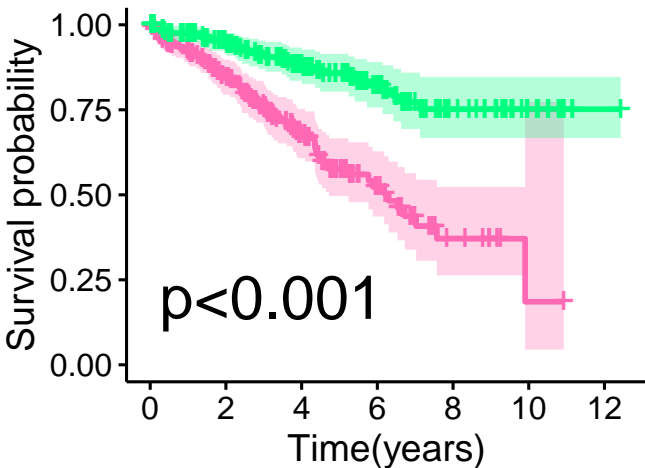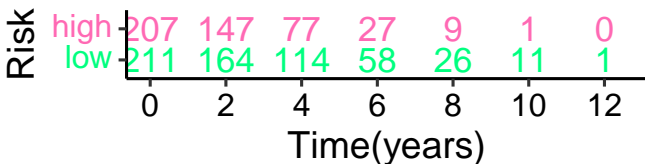

Supplement: code2.zip [file code2.zip]

Overall survival

Risk  High risk  Low risk

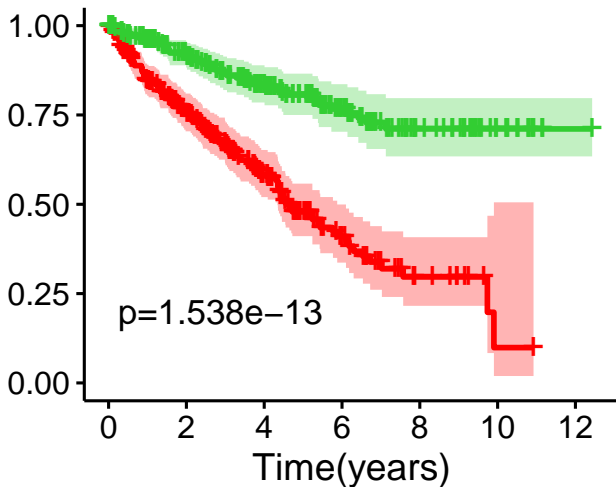

Risk

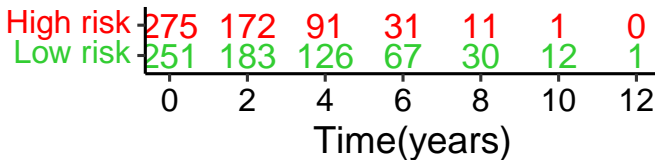

Supplement: code2.zip [file code2.zip]

T I-II III-IV

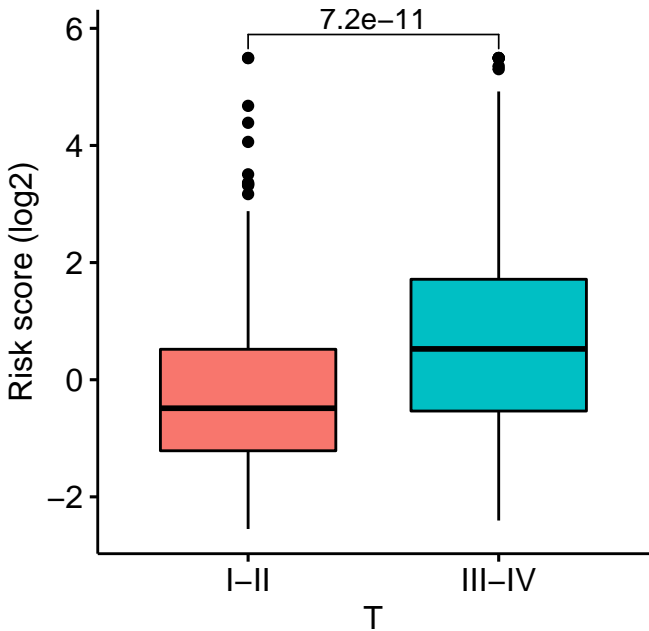

Supplement: code2.zip [file code2.zip]

# Patients with Female

Risk  high  low

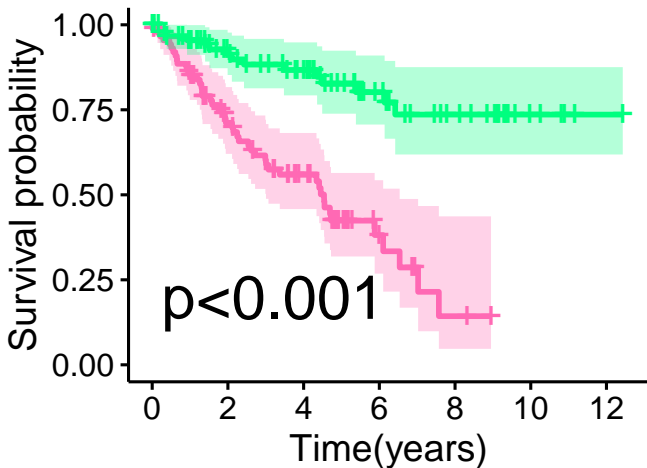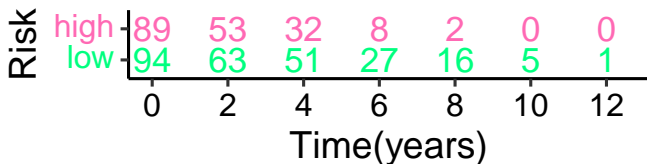

Supplement: code2.zip [file code2.zip]

Risk score

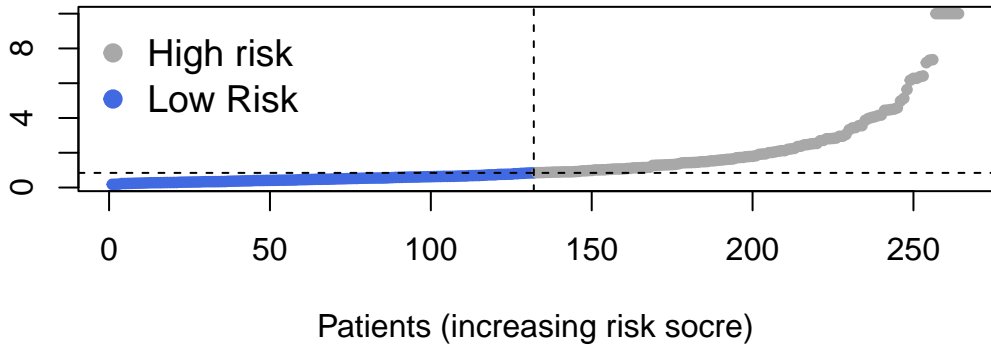

Supplement: code2.zip [file code2.zip]

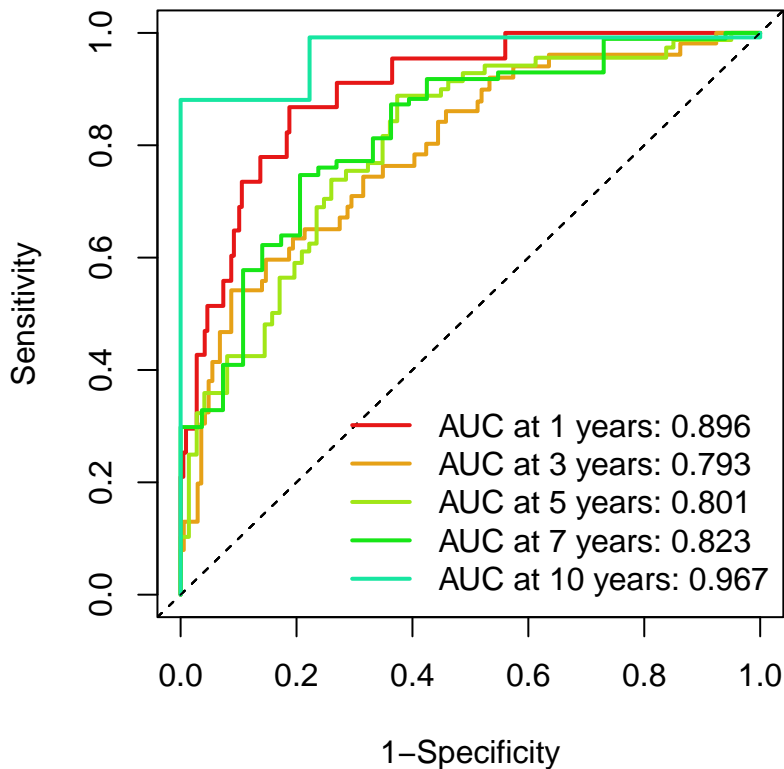

Supplement: code2.zip [file code2.zip]

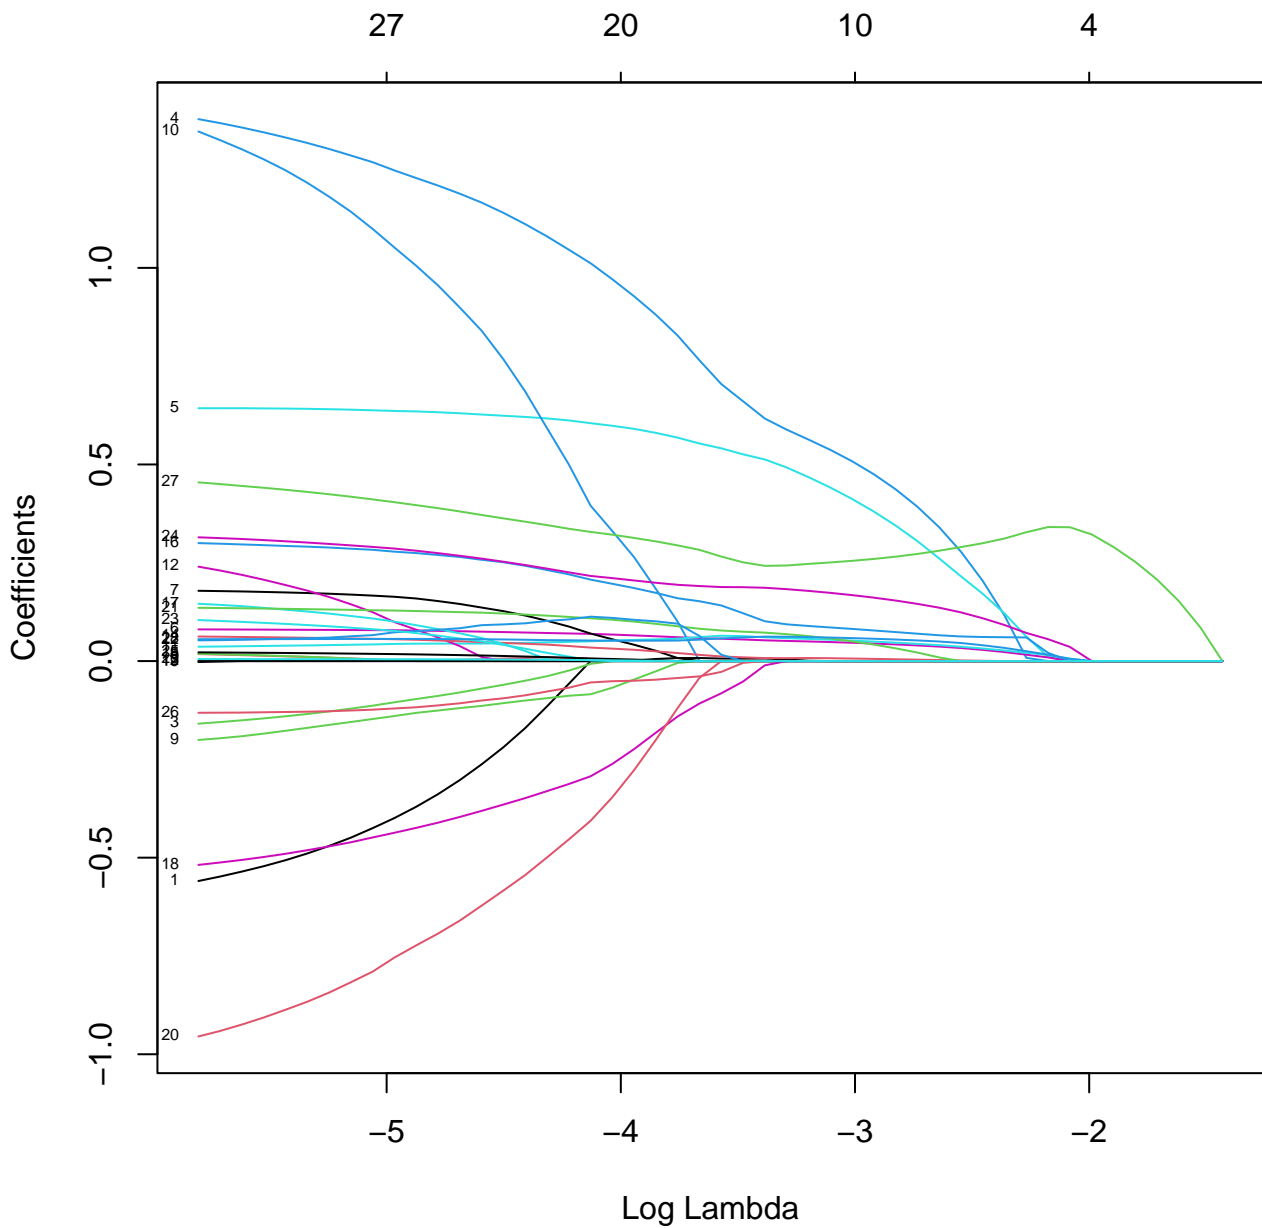

Supplement: code2.zip [file code2.zip]

stage I-II III-IV

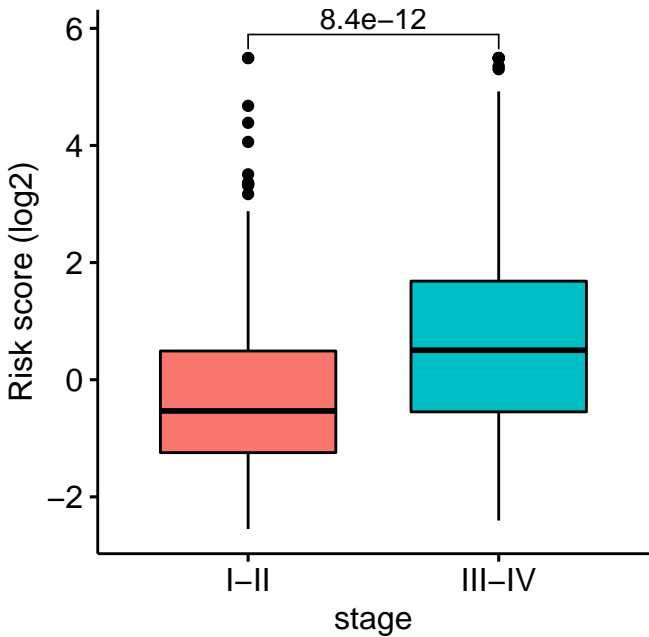

Supplement: code2.zip [file code2.zip]

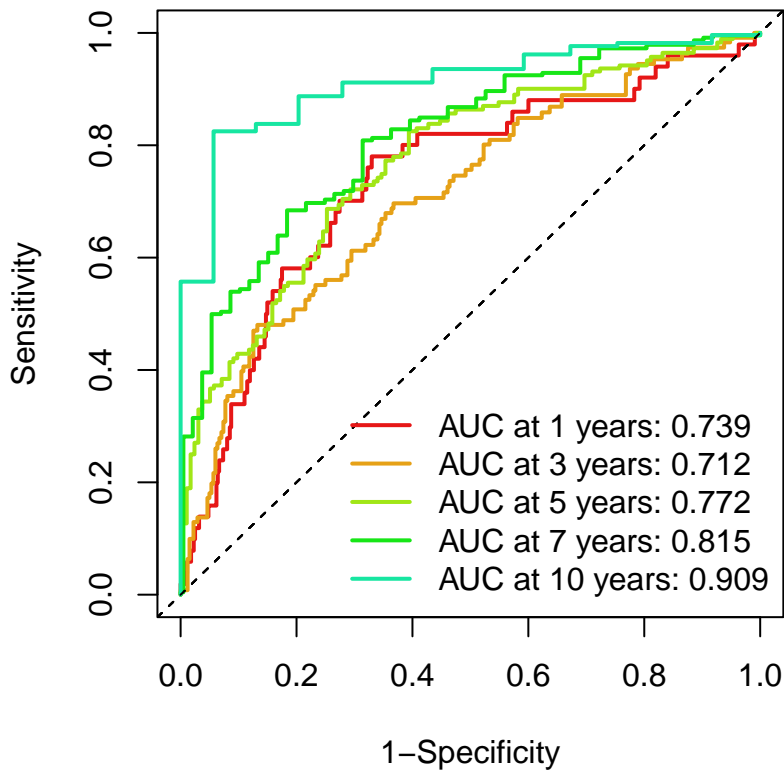

Supplement: code2.zip [file code2.zip]

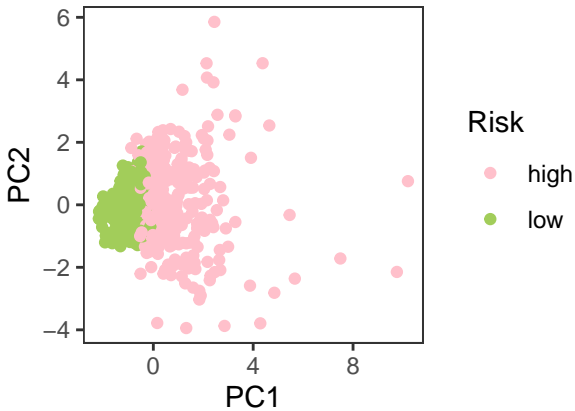

Supplement: code2.zip [file code2.zip]

Survival time (years)

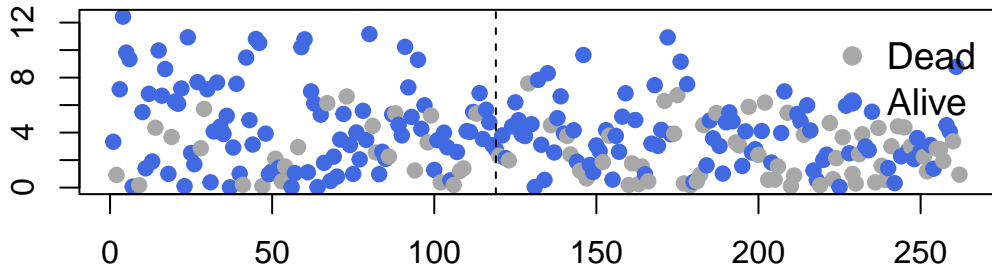

Patients (increasing risk score)

Supplement: code2.zip [file code2.zip]

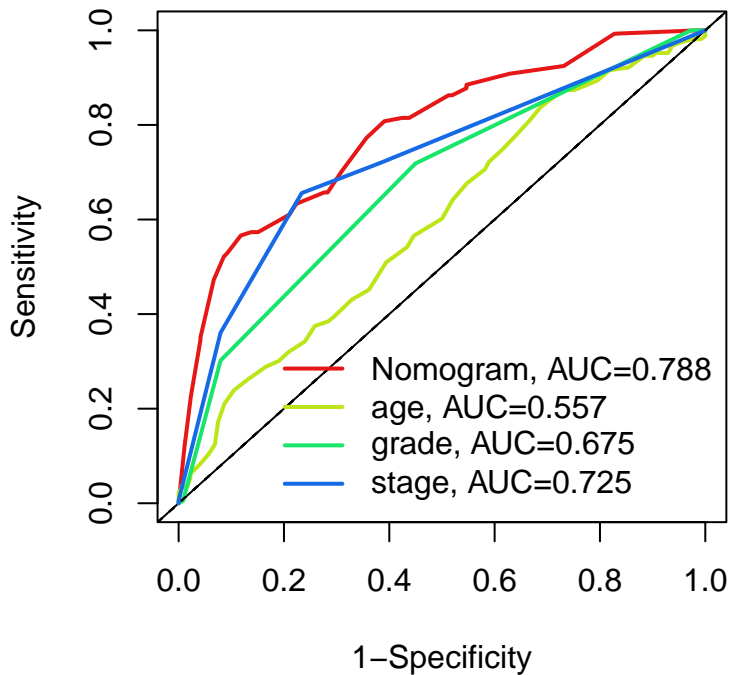

Supplement: code2.zip [file code2.zip]

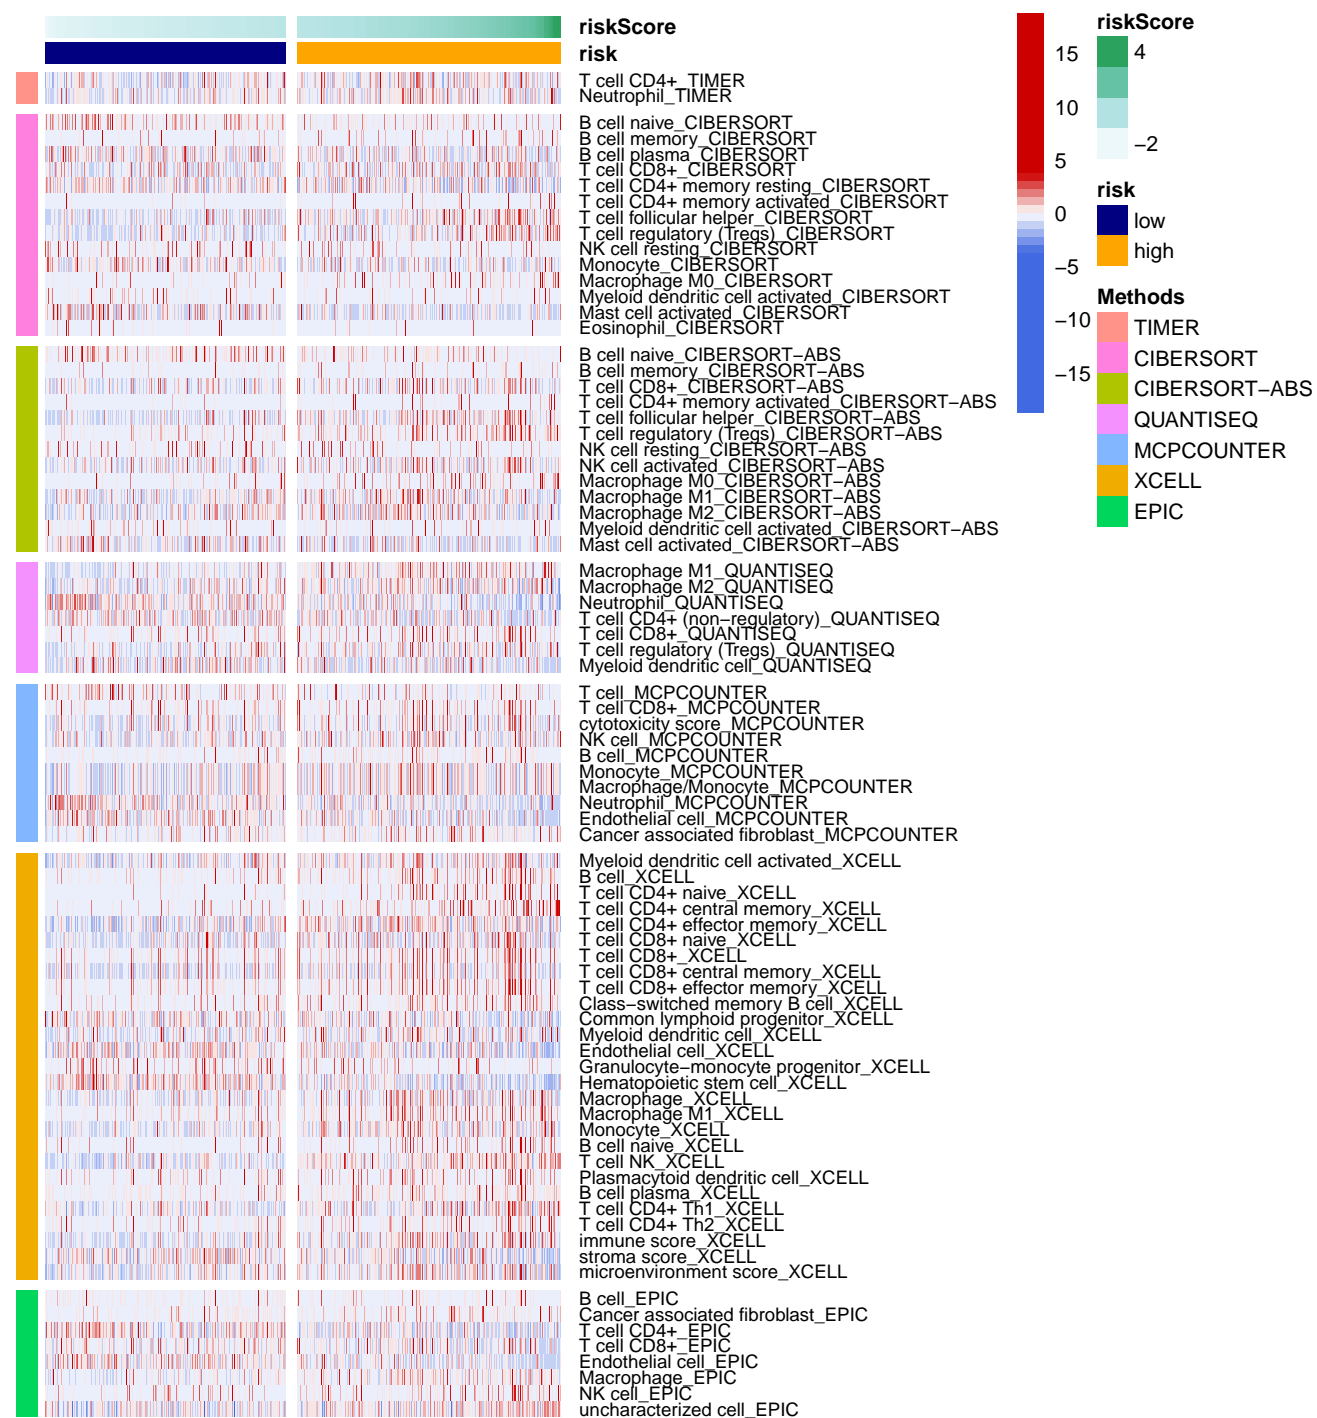

Methods

Supplement: code2.zip [file code2.zip]

N N0 N1 Unknown

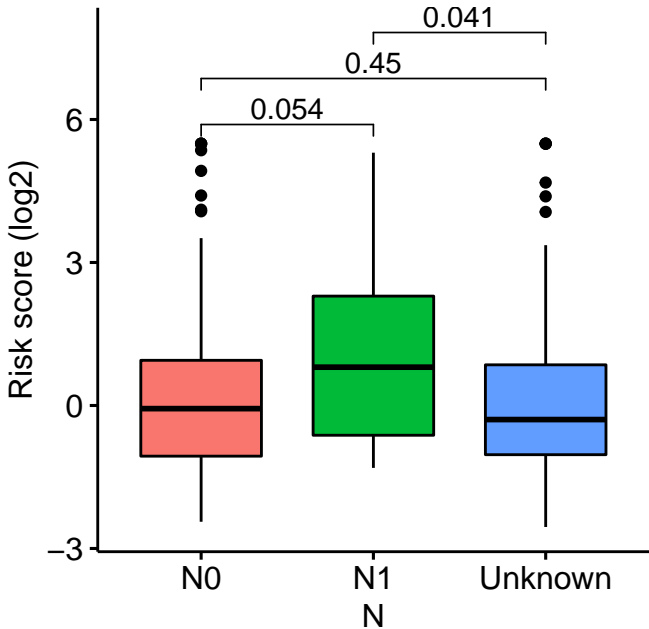

Supplement: code2.zip [file code2.zip]

# Patients with N1

Risk  high  low

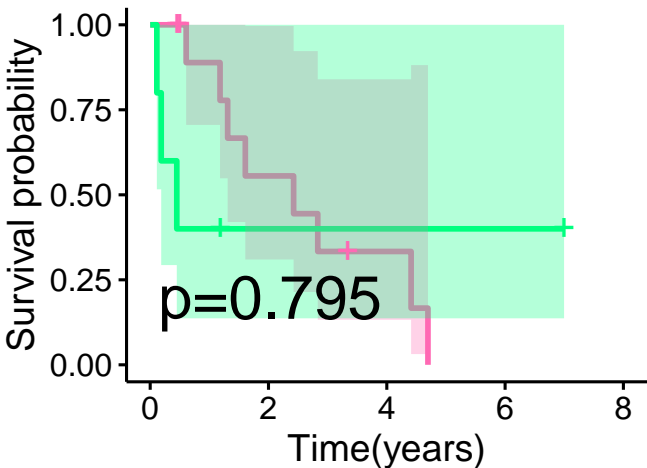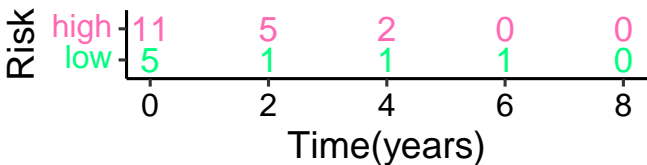

Supplement: code2.zip [file code2.zip]

survival Alive Dead

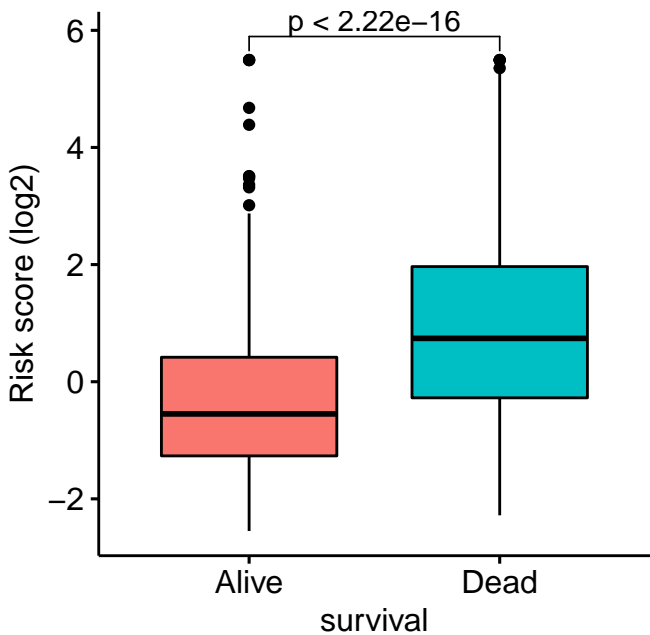

Supplement: code2.zip [file code2.zip]

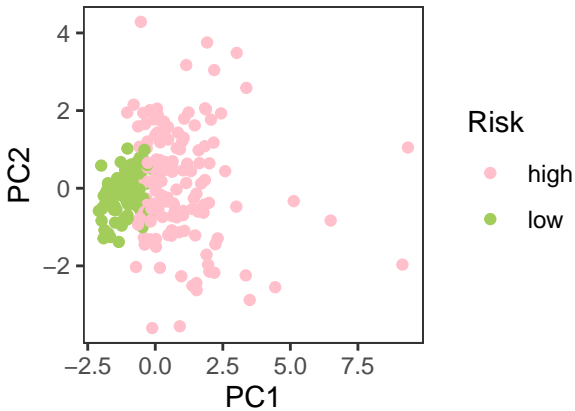

Supplement: code2.zip [file code2.zip]

M M0 M1 Unknown

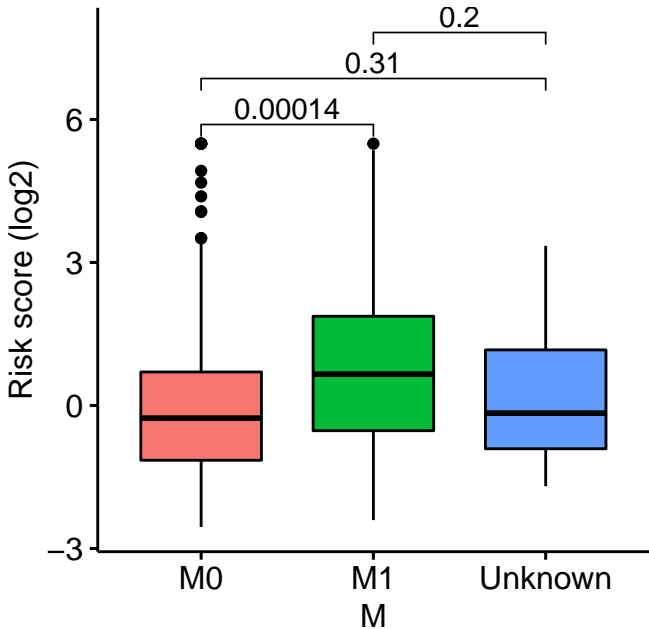

Supplement: code2.zip [file code2.zip]

# Patients with age $\leq$ 60 years

Risk  high  low

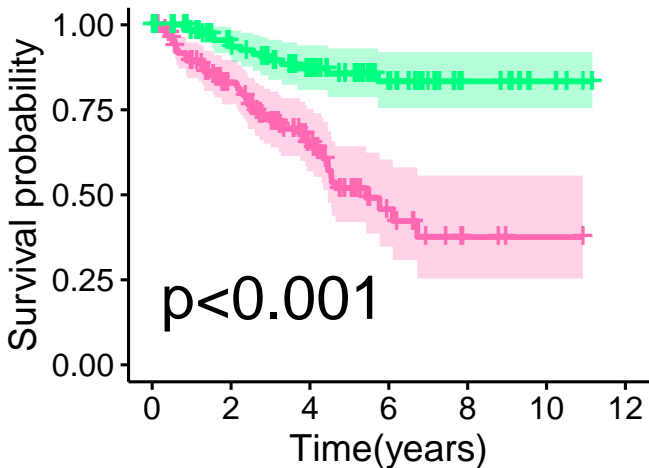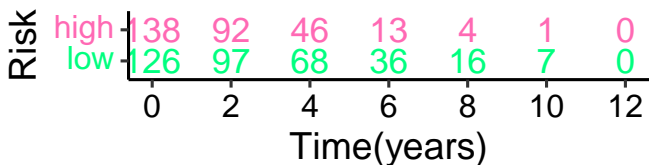

Supplement: code2.zip [file code2.zip]

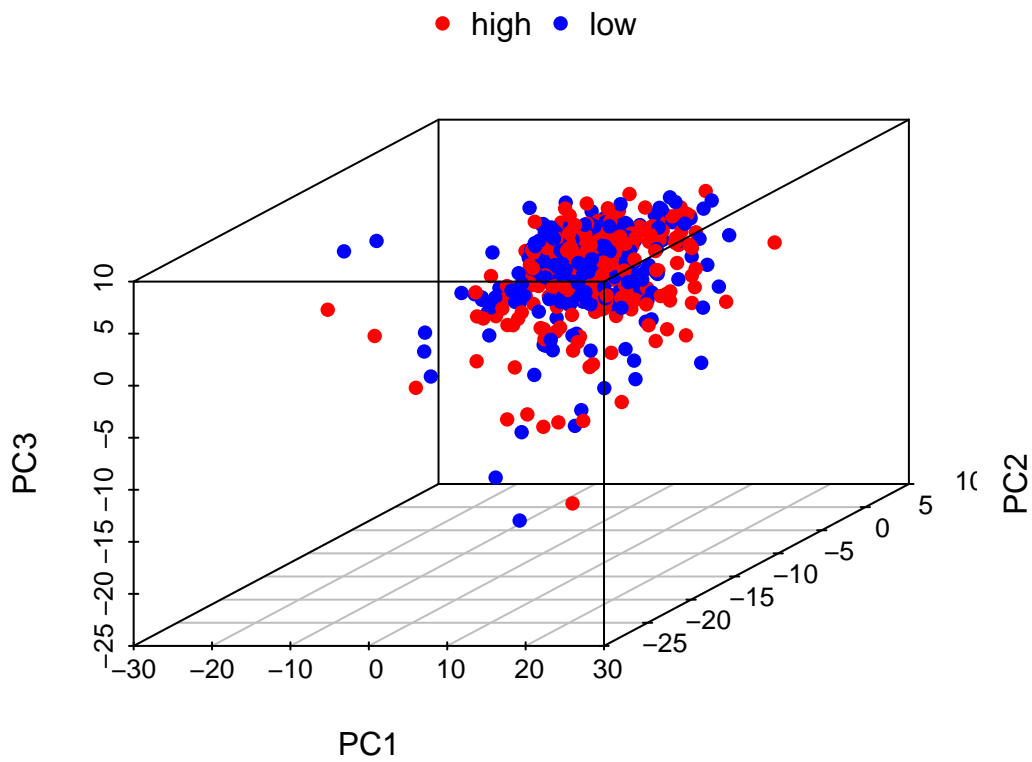

Supplement: code2.zip [file code2.zip]

# Patients with M1

Risk  high  low

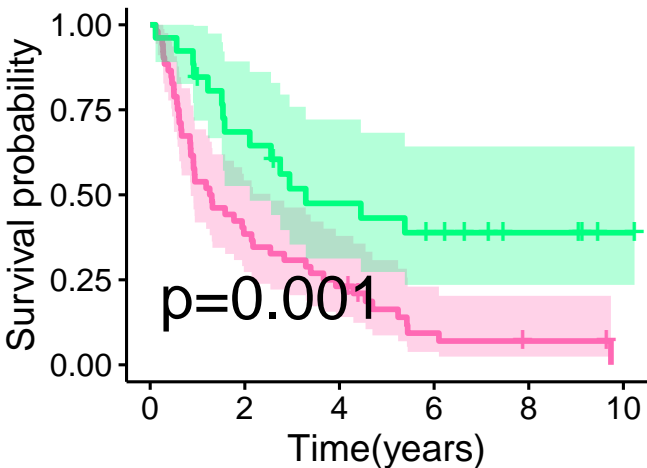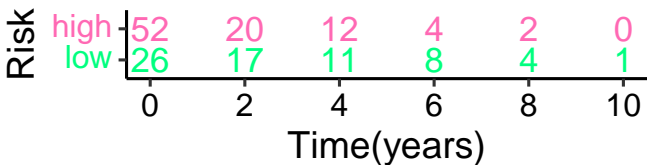

Supplement: code2.zip [file code2.zip]

Response

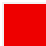

Non-responder

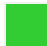

Responder

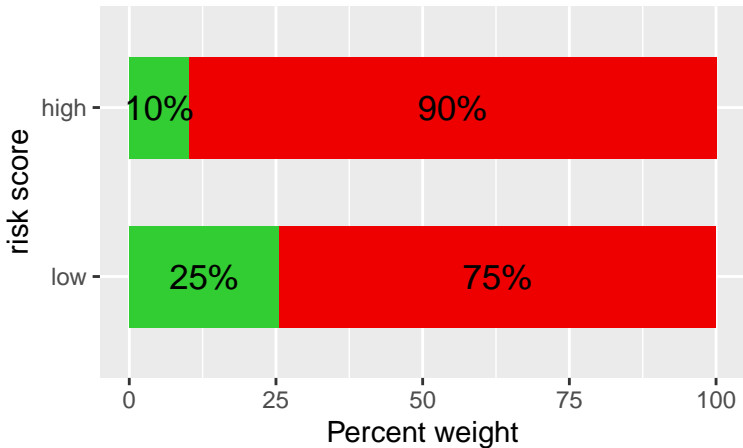

Supplement: code2.zip [file code2.zip]

# Patients with N0

Risk  high  low

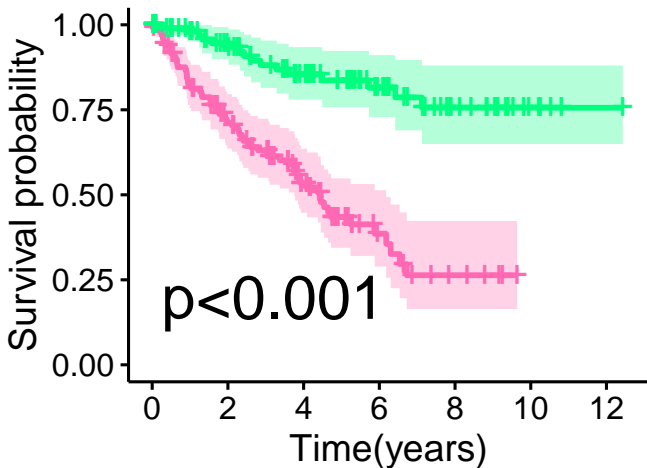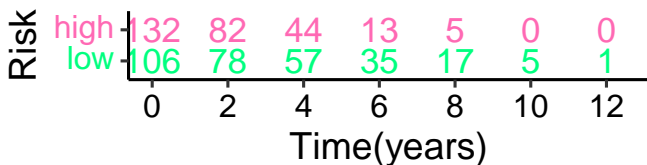

Supplement: code2.zip [file code2.zip]

Survival time (years)

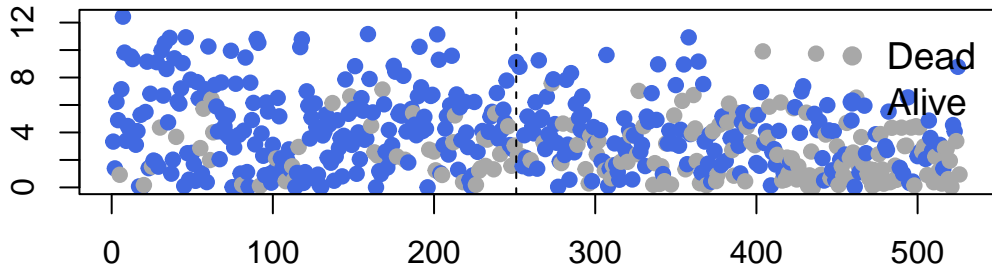

Patients (increasing risk socre)

Supplement: code2.zip [file code2.zip]

Standardized Net Benefit

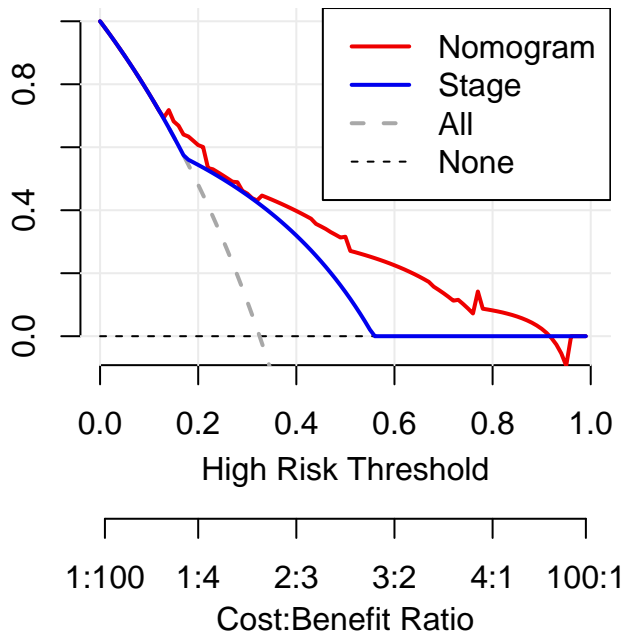

Supplement: code2.zip [file code2.zip]
